# Supplementary material for: Thiophene-based twisted bistricyclic aromatic ene with tricoordinate boron: a new n-type semiconductor
Source: Royal Society of Chemistry journal article supplement (doi:10.1039/d0cc07952a), 2021-01-01
Supplement: d0cc07952a1.pdf [file d0cc07952a1.pdf]

## Supporting Information

### **Thiophene-based twisted bistricyclic aromatic ene with tricoordinate boron: a new n-type semiconductor**

Yohei Adachi,<sup>\*a</sup> Takanori Nomura,<sup>a</sup> Shion Tazuhara,<sup>b</sup> Hiroyoshi Naito<sup>\*b</sup> and Joji Ohshita<sup>\*a,c</sup>

<sup>a</sup> *Applied Chemistry Program, Graduate School of Advanced Science and Engineering, Hiroshima University, Higashi-Hiroshima 739-8527, Japan*

<sup>b</sup> *Department of Physics and Electronics, Graduate School of Engineering, Osaka Prefecture University, 1-1 Gakuen-cho, Naka-ku, Sakai, Osaka 599-8531, Japan*

<sup>c</sup> *Division of Materials Model-Based Research, Digital Monozukuri (Manufacturing) Education and Research Center, Hiroshima University, Higashi-Hiroshima 739-0046, Japan*

## **Experimental**

### *General*

All reactions were carried out under dry argon. For the reaction solvents, toluene, diethyl ether, dichloromethane, dioxane, and DMSO were purchased from Kanto Chemical Co., Ltd. and were distilled from calcium hydride and stored over activated molecular sieves under argon until use. All other chemicals were purchased from Wako Pure Chemical Industries, Ltd. and TCI Co., Ltd. Starting material bis(2-bromothiophen-3-yl)methane was prepared according to literature.<sup>[S1]</sup> Room-temperature NMR spectra were recorded on Varian System 500 and 400MR spectrometers, whereas VT-NMR experiments were performed on a JEOL JNM-ECA500 spectrometer. Abbreviations Th and <sup>F</sup>Mes used for the following NMR assignments stand for fused thiophene ring and 1,3,5-tris(trifluoromethyl)phenyl group, respectively. High-resolution mass spectra were obtained on a Thermo Fisher Scientific LTQ Orbitrap XL spectrometer at N-BARD, Hiroshima University. ESR spectra of **ddTCB** solutions in benzene (1.0 mmol/L) and pyridine (2.0 mmol/L) were recorded on a JEOL JES-RE1X spectrometer (X-band) in the dark at room temperature with a Mn<sup>2+</sup>/MgO standard sample to calibrate the magnetic fields. DSC analysis was carried out under gentle nitrogen flow at a heating rate of 10 °C/min using the SII DSC6200 analyzer. The measurements of single-crystal X-ray diffraction, VT-NMR, and HR-MS were made at the Natural Science Center for Basic Research and Development (N-BARD), Hiroshima University.

### *XRD measurements*

Single crystal X-ray diffraction data was collected at 123 K on a Bruker AXS SMART APEX II ULTRA diffractometer at Natural Science Center for Basic Research and Development (N-BARD), Hiroshima University, using MoK $\alpha$  radiation monochromated with a multilayered confocal mirror. The structure was solved by Intrinsic Phasing on the SHELXT-2014/4 program and expanded using Fourier techniques. Non-hydrogen atoms were refined anisotropically, whereas hydrogen atoms were included but not refined (SHELXL-2014/6). All other calculations were performed using the APEXII crystallographic software package of Bruker AXS. Graphical crystal structures were generated using Mercury 3.10.3 (Cambridge Crystallographic Data Centre). Powder XRD patterns were obtained on a Rigaku Ultima IV multipurpose

X-ray diffraction system.

### Photophysical measurements

Room-temperature UV–vis absorption spectra were measured with a HITACHI U-2910 spectrophotometer, whereas VT-absorption spectra were acquired with a Shimadzu UV-3600 plus spectrometer. The concentration of the samples was 10  $\mu\text{mol/L}$ . In the titration experiments, aliquots of a tetrabutylammonium cyanide (TBACN) solution in toluene (5  $\mu\text{L}$ , 3.0 mmol/L, 0.5 equivalents) were added to a solution of **ddTCB** in toluene (10  $\mu\text{mol/L}$ , 3.0 mL) every 5 minutes. Cyclic voltammetry measurements were performed with an AMETEK VersaSTAT 4 potentiostat/galvanostat in a 1.0 mM solution in dichloromethane containing 0.1 M  $n\text{Bu}_4\text{NPF}_6$  at a 100  $\text{mV s}^{-1}$  scan rate using a three-electrode system which was composed of a Pt plate as the counter electrode, a Pt wire as the working electrode, and an Ag wire as the pseudo-reference electrode. The potentials were corrected using ferrocene as the internal standard.

### DFT calculations

All geometrical optimizations and TD-DFT calculations were performed on a Gaussian 16 program at the B3LYP/6-311+G(d,p) level of theory.<sup>[S2]</sup> No imaginary frequencies were found for all the ground state optimized structures, whereas only one imaginary frequency was observed for the TS geometry. The intrinsic reaction coordinate (IRC) calculation was performed on the TS structure at the same level to confirm that the transition state connects the twisted and folded conformers. The ground state geometries of the twisted and folded conformers of **ddTCB** were optimized with  $C_2$  symmetry. NMR chemical shifts were calculated using GIAO method at the B3LYP/6-311+G(2d,p) level.

### Synthesis

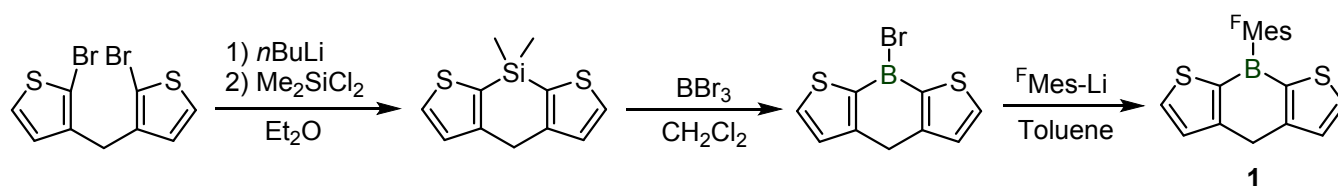

### Synthesis of 8,8-dimethyl-4,8-dihydrosilino[2,3-*b*:6,5-*b'*]dithiophene

To a solution of bis(2-bromothiophen-3-yl)methane (8.74 g, 25.8 mmol) in 50 mL of diethyl ether was slowly added 18.9 mL (52.9 mmol) of 2.8 mol/L *n*BuLi in hexane at  $-78\text{ }^{\circ}\text{C}$  for 20 min, and the mixture was stirred for 30 min at the temperature. Dimethyldichlorosilane (3.28 mL, 27.1 mmol) was then added slowly to the mixture at  $-78\text{ }^{\circ}\text{C}$ . The mixture was warmed to room temperature and then stirred overnight. The resulting mixture was hydrolyzed with water, and the organic layer was washed twice with water and then once with brine. After drying over anhydrous magnesium sulfate, the solvent was evaporated. The crude product was purified by silica gel chromatography using a 10:1 mixture of hexane/dichloromethane as the eluent to give 3.97 g (16.8 mmol, 65% yield) of the title compound as a white solid.  $^1\text{H}$  NMR (400 MHz,  $\text{CDCl}_3$ )  $\delta$ : 7.64 (d,  $J = 4.6$  Hz, 2H, Th), 7.13 (d,  $J = 4.6$  Hz, 2H, Th), 4.26 (s, 2H,  $\text{CH}_2$ ), 0.50 (s, 6H,  $\text{SiMe}_2$ ).  $^{13}\text{C}$  NMR (100 MHz,  $\text{CDCl}_3$ )  $\delta$ : 147.6, 130.7, 129.0, 128.4, 32.0, 1.2. HRMS (APCI, positive) Calcd for  $\text{C}_{11}\text{H}_{12}\text{S}_2\text{Si}$ :  $\text{M}^+$ : 236.01442, Found 236.01416. m.p.  $61.5\text{-}63.5\text{ }^{\circ}\text{C}$ .

#### **Synthesis of 8-bromo-4,8-dihydroborinino[2,3-*b*:6,5-*b'*]dithiophene.**

To a solution of 8,8-dimethyl-4,8-dihydrosilino[2,3-*b*:6,5-*b'*]dithiophene (3.09 g, 13.1 mmol) in 15 mL of dichloromethane was slowly added 14.5 mL (14.5 mmol) of 1.0 mol/L  $\text{BBr}_3$  in dichloromethane at  $-78\text{ }^{\circ}\text{C}$  for 5 min. The mixture was gradually warmed to room temperature and stirred overnight. All volatiles were removed in vacuum to give the product quantitatively as a brown solid. The product was used in the next step without further purification.  $^1\text{H}$  NMR (400 MHz,  $\text{CDCl}_3$ )  $\delta$ : 7.92 (d,  $J = 4.7$  Hz, 2H, Th), 7.36 (d,  $J = 4.7$  Hz, 2H, Th), 4.24 (s, 2H,  $\text{CH}_2$ ).  $^{13}\text{C}$  NMR (100 MHz,  $\text{CDCl}_3$ )  $\delta$ : 154.2, 136.7, 128.8, 32.8. One signal for B-C was not detected, probably due to its low intensity as a result of quadrupolar broadening.  $^{11}\text{B}$  NMR (128 MHz,  $\text{CDCl}_3$ )  $\delta$ : 45.9.

#### **Synthesis of 1.**

To a solution of 1,3,5-tris(trifluoromethyl)benzene (4.63 g, 16.4 mmol) in 50 mL of ether were slowly added 10.6 mL (16.4 mmol) of 1.55 mol/L *n*BuLi in hexane at  $-78\text{ }^{\circ}\text{C}$  for 5 min. The mixture was stirred for 3 hours at room temperature, then the solvent was removed in vacuum to give the lithium salt. The solid was redissolved in 20 mL of toluene at  $0\text{ }^{\circ}\text{C}$ , then cooled to  $-78\text{ }^{\circ}\text{C}$ . A solution of 8-bromo-4,8-

dihydroborinino[2,3-*b*:6,5-*b'*]dithiophene (13.1 mmol) in 20 mL of toluene was slowly added to the above solution, then the mixture was stirred overnight at room temperature. The resulting mixture was hydrolyzed with saturated NH<sub>4</sub>Cl aqueous solution, and the organic layer was washed twice with brine. After drying over anhydrous magnesium sulfate, the solvent was evaporated. The crude product was purified by silica gel chromatography using a 10:1 mixture of hexanes/dichloromethane as the eluent to give 3.82 g (8.11 mmol, 49% yield) of the title compound as a white solid. <sup>1</sup>H NMR (400 MHz, CDCl<sub>3</sub>) δ: 8.18 (s, 2H, <sup>F</sup>Mes), 7.88 (d, *J* = 4.7 Hz, 2H, Th), 7.36 (d, *J* = 4.7 Hz, 2H, Th), 4.42 (s, 2H, CH<sub>2</sub>). <sup>13</sup>C NMR (100 MHz, CDCl<sub>3</sub>) δ: 154.1, 143.1 (br, B–C), 137.8 (br, B–C), 136.4, 134.6 (q, *J*<sub>C-F</sub> = 32 Hz, *o*-CCF<sub>3</sub>), 131.7 (q, *J*<sub>C-F</sub> = 34 Hz, *p*-CCF<sub>3</sub>), 128.3, 126.0 (m), 123.4 (q, *J*<sub>C-F</sub> = 275 Hz, *o*-CF<sub>3</sub>), 122.9 (q, *J*<sub>C-F</sub> = 273 Hz, *p*-CF<sub>3</sub>), 32.9. <sup>11</sup>B NMR (128 MHz, CDCl<sub>3</sub>) δ: 47.7. <sup>19</sup>F NMR (376 MHz, CDCl<sub>3</sub>) δ: -57.6, -63.1. HRMS (APCI, positive) Calcd for C<sub>18</sub>H<sub>8</sub>BF<sub>9</sub>S<sub>2</sub>: M<sup>+</sup>: 470.00146, Found 470.00052. m.p. 131.9-134.3°C.

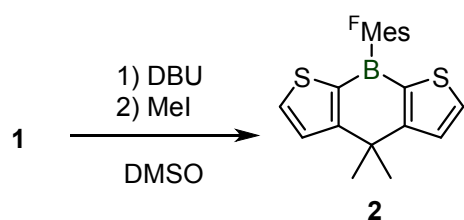

### Synthesis of 2.

To a solution of **1** (78.1 mg, 0.166 mmol) in 4 mL of DMSO were added 74.5 μL (0.498 mmol) of DBU at room temperature and stirred for 30 min. Then methyl iodide (52 μL, 0.835 mmol) was added to the mixture and the mixture was stirred for additional 2 hours. The resulting mixture was hydrolyzed with water and extracted with hexane. The organic layer was washed three times with water and then once with brine. After drying over anhydrous magnesium sulfate, the solvent was evaporated. The crude product was purified by silica gel chromatography using hexanes as the eluent to give 66.3 mg (0.133 mmol, 80% yield) of **2** as a white solid. <sup>1</sup>H NMR (400 MHz, CDCl<sub>3</sub>) δ: 8.17 (s, 2H, <sup>F</sup>Mes), 7.87 (d, *J* = 4.8 Hz, 2H, Th), 7.45 (d, *J* = 4.8 Hz, 2H, Th), 1.68 (s, 6H, CH<sub>3</sub>). <sup>13</sup>C NMR (100 MHz, cdcl<sub>3</sub>) δ = 164.8, 143.1 (br, B–C), 136.8, 135.9 (br, B–C), 134.7 (q, *J*<sub>C-F</sub> = 32 Hz, *o*-CCF<sub>3</sub>), 131.7 (q, *J*<sub>C-F</sub> = 34 Hz, *p*-CCF<sub>3</sub>), 127.0, 126.0 (m), 123.5 (q, *J*<sub>C-F</sub> = 275 Hz, *o*-CF<sub>3</sub>), 122.9 (q, *J*<sub>C-F</sub> = 273 Hz, *p*-CF<sub>3</sub>), 42.3, 31.5. <sup>11</sup>B NMR (128 MHz, CDCl<sub>3</sub>) δ: 47.6. <sup>19</sup>F NMR (376 MHz, CDCl<sub>3</sub>) δ: -57.6, -63.1. HRMS (APCI, positive) Calcd for C<sub>20</sub>H<sub>12</sub>BF<sub>9</sub>S<sub>2</sub>: M<sup>+</sup>: 498.03280, Found

498.03259. m.p. 130.8-133.6°C.

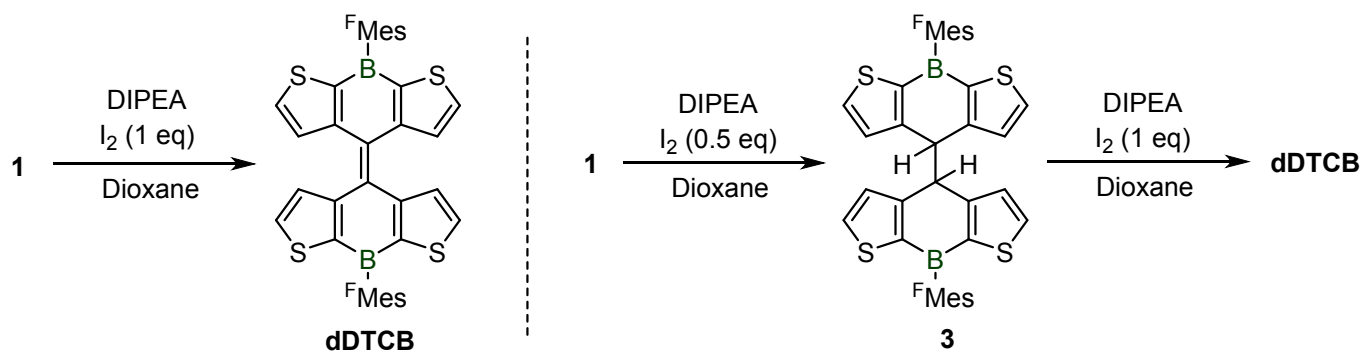

### Synthesis of **dDTCB**.

To a solution of **1** (105 mg, 0.224 mmol) and I<sub>2</sub> (58.0 mg, 0.229 mmol) in 5 mL of dioxane was added 190  $\mu$ L (1.12 mmol) of DIPEA at room temperature and the mixture was stirred overnight. The resulting mixture was hydrolyzed with water and extracted with dichloromethane. The organic layer was washed once with saturated sodium thiosulfate aqueous solution, twice with water, then once with brine. After drying over anhydrous magnesium sulfate, the solvent was evaporated. The crude product was purified by silica gel chromatography using hexanes as the eluent to give 99.7 mg (0.106 mmol, 95 % yield) of **dDTCB** as a black powder. <sup>1</sup>H NMR (400 MHz, CDCl<sub>3</sub>)  $\delta$ : 8.22 (s, 4H, <sup>F</sup>Me), 7.74 (d,  $J = 5.0$  Hz, 4H, Th), 7.54 (d,  $J = 5.0$  Hz, 4H, Th). <sup>13</sup>C NMR (100 MHz, CDCl<sub>3</sub>)  $\delta = 148.9$  (Th), 143.3 (br, B-C<sub>Th</sub>), 142.3 (br, B-C<sub>FMe</sub>), 138.6 (C=C), 135.0 (q,  $J_{C-F} = 32$  Hz, *o*-CCF<sub>3</sub>), 133.7 (Th), 133.2 (Th), 131.9 (q,  $J_{C-F} = 35$  Hz, *p*-CCF<sub>3</sub>), 126.1 (m, <sup>F</sup>Me), 123.5 (q,  $J_{C-F} = 276$  Hz, *o*-CF<sub>3</sub>), 122.9 (q,  $J_{C-F} = 273$  Hz, *p*-CF<sub>3</sub>). <sup>11</sup>B NMR (160 MHz, CDCl<sub>3</sub>)  $\delta$ : 45.5. <sup>19</sup>F NMR (470 MHz, CDCl<sub>3</sub>)  $\delta$ : -57.4, -63.0. HRMS (APCI, positive) Calcd for C<sub>36</sub>H<sub>12</sub>B<sub>2</sub>F<sub>18</sub>S<sub>4</sub>: M<sup>+</sup>: 935.97260, Found 935.97412. s.p. 336°C (DSC).

### Synthesis of **3**.

Compound **3** was prepared from 48.1 mg (0.102 mmol) of **1**, 13.1 mg (51.6  $\mu$ mol) of I<sub>2</sub>, and 87  $\mu$ L (0.512 mmol) of DIPEA in 3 mL of dioxane in a manner similar to that above. The product was obtained as a white solid (34.1 mg, 36.3  $\mu$ mol, 71% yield). <sup>1</sup>H NMR (500 MHz, CDCl<sub>3</sub>)  $\delta$ : 8.18 (s, 2H, <sup>F</sup>Me), 8.16 (s, 2H, <sup>F</sup>Me), 7.79 (d,  $J = 4.8$ , 4H, Th), 6.98 (br s, 4H, Th), 5.42 (s, 2H, CH). <sup>13</sup>C NMR (125 MHz, CDCl<sub>3</sub>)  $\delta = 155.6$ , 142.7 (br, B-C), 138.9 (br, B-C), 137.0, 134.6 (m, *o*-CCF<sub>3</sub>), 131.7 (q,  $J_{C-F} = 34$  Hz, *p*-CCF<sub>3</sub>), 127.7,

126.0 (m), 125.7 (m), 123.6 (m, *o*-CF<sub>3</sub>), 122.8 (q,  $J_{C-F} = 273$  Hz, *p*-CF<sub>3</sub>), 49.2. <sup>11</sup>B NMR (160 MHz, CDCl<sub>3</sub>)  $\delta$ : 48.4. <sup>19</sup>F NMR (470 MHz, CDCl<sub>3</sub>)  $\delta$ : -57.3, -57.4, -63.1. HRMS (ESI, positive) Calcd for C<sub>36</sub>H<sub>14</sub>B<sub>2</sub>F<sub>18</sub>S<sub>4</sub>: [M+Na]<sup>+</sup>: 960.97816, Found 960.97882.

### Synthesis of **ddTCB** from **3**.

Compound **ddTCB** was prepared from 50.7 mg (54.0  $\mu$ mol) of **3**, 15.0 mg (59.1  $\mu$ mol) of I<sub>2</sub>, and 46  $\mu$ L (0.270 mmol) of DIPEA in 5 mL of dioxane in a manner similar to that above. The product was obtained as a black powder (44.9 mg, 48.0  $\mu$ mol, 89 % yield).

### *Fabrication of OFETs*

Fig. S20 shows the schematic illustration of top-gate/bottom-contact **ddTCB** OFET, along with the chemical structures of the organic materials used in the OFETs. The glass substrates were sequentially washed with acetone and isopropyl alcohol (IPA) in ultrasonic baths, followed by exposure to UV/O<sub>3</sub>. An insulating polymer of poly (4-vinylphenol) (PVP, Sigma-Aldrich) mixed with a cross-linking agent of poly (melamine-co-formaldehyde) (PMF, Sigma-Aldrich) in a weight ratio of 2:1 was dissolved in propylene glycol monomethyl ether acetate. The PVP:PMF solution was deposited onto the glass substrates by spin coating in ambient air, and the PVP:PMF thin films were cured at 200 °C under vacuum for 1 h to form cross-linked PVP thin films. After the fabrication of 30-nm-thick Au source-drain electrodes with 2-nm-thick Cr adhesion layers on the substrates by vacuum evaporation using a shadow mask, a thin layer of poly(ethyleneimine) (PEI), an electron-injection layer, was spun onto the surface of the substrate with source and drain Au electrodes from 0.1-wt% ethanol solution at 2000 rpm for 30 s. The substrate was then annealed in ambient atmosphere for 10 min at 150 °C. The channel length (L) and width (W) were 100  $\mu$ m and 1.5 mm, respectively.

0.5 wt% **ddTCB** toluene solution was spin-coated on the substrates at 500 rpm for 5 s and then at 1000 rpm for 60 s in N<sub>2</sub> atmosphere. After drying **ddTCB** thin films at room temperature for 1 h and then at 100°C for 10 min, an amorphous fluoropolymer solution, CYTOPT™ (CTL-809 M, AGC), diluted at 6 wt% using a dilution solvent (CT-SOLV180, AGC) was spin-coated on the **ddTCB** thin films at 500 rpm for 10 s and then at 4000 rpm for 60 s, and was dried overnight in N<sub>2</sub> atmosphere to form a gate insulator with thickness of

~300 nm. Finally, 40-nm-thick Al gate electrodes were fabricated on the CYTOP layers by shadow-mask evaporation. The organic films, except for the cross-linked PVP films, were prepared in glove boxes filled with N<sub>2</sub>.

Of key importance in the fabrication of n-channel OFETs is the coating of a thin polyethyleneimine (PEI) layer of approximately 1 nm thickness on source and drain electrodes in OFETs with the top-gate configuration.<sup>[S3]</sup> The PEI layer reduces the electron injection barrier from Au source electrode to **ddTCB** because of the formation of dipole moment.<sup>[S4]</sup>

### *Electrical characterization of OFETs*

The electrical characteristics of the **ddTCB** OFET were measured using Keithley 6430 and 2400 source meters in an N<sub>2</sub>-filled glove box at room temperature. The field-effect mobility,  $\mu_{FE}$ , and the threshold voltage,  $V_{th}$ , were determined by the following standard FET equation using the transfer characteristics measured in the saturation regime:

$$I_D = \frac{\mu_{FE} C_i W}{2L} (V_G - V_{th})^2 \quad (1)$$

where  $I_D$  is the drain current,  $C_i$  is the capacitance per unit area for the gate insulator, and  $V_G$  is the gate voltage.

### *References*

- [S1] J. C. Bijleveld, M. Shahid, J. Gilot, M. M. Wienk, R. A. J. Janssen, *Adv. Funct. Mater.* **2009**, *19*, 3262–3270.
- [S2] *Gaussian 16*, Revision A.03; Gaussian, Inc.: Wallingford, CT, 2016, <https://gaussian.com/gaussian16/>
- [S3] K. Takagi, T. Nagase, T. Kobayashi, H. Naito, *Organic Electronics* **2016**, *32*, 65-69.
- [S4] M. Takada, T. Nagase, T. Kobayashi, H. Naito, *Organic Electronics* **2017**, *50*, 290-295.



## Supporting Figures and Tables

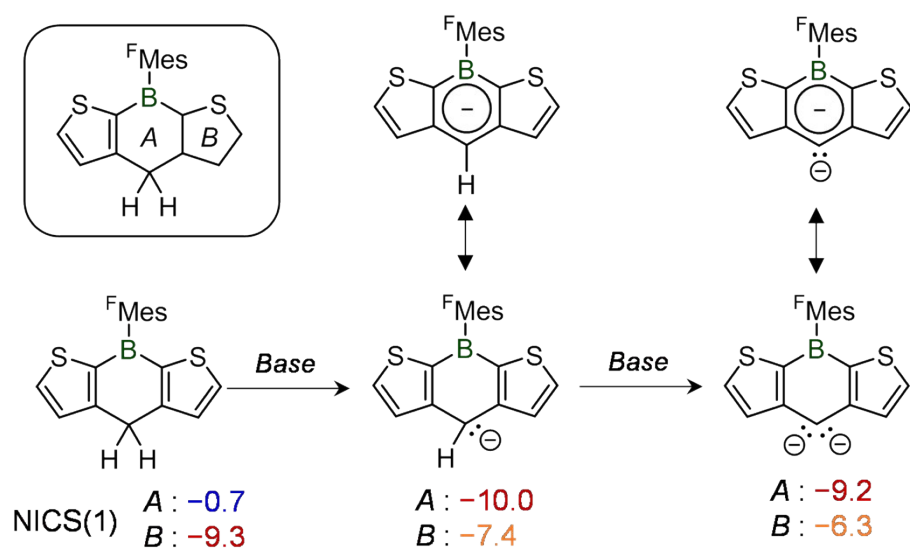

**Figure S1.** NICS(1) values of thiophene-annulated dihydroborinines calculated at the B3LYP/6-311+G(2d,p) level.

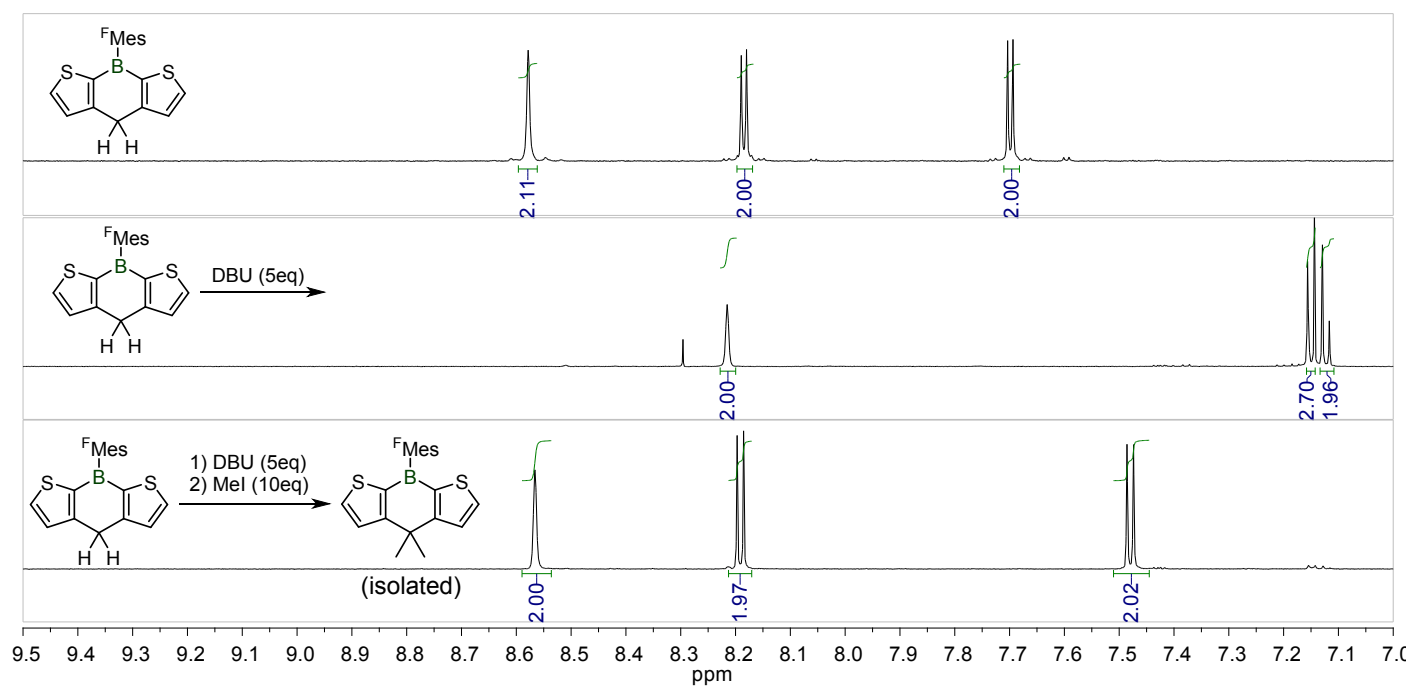

**Figure S2.** Partial  $^1\text{H}$  NMR spectra of **1** in the presence and absence of DBU, and methylated product **2** in  $\text{DMSO-}d_6$ .

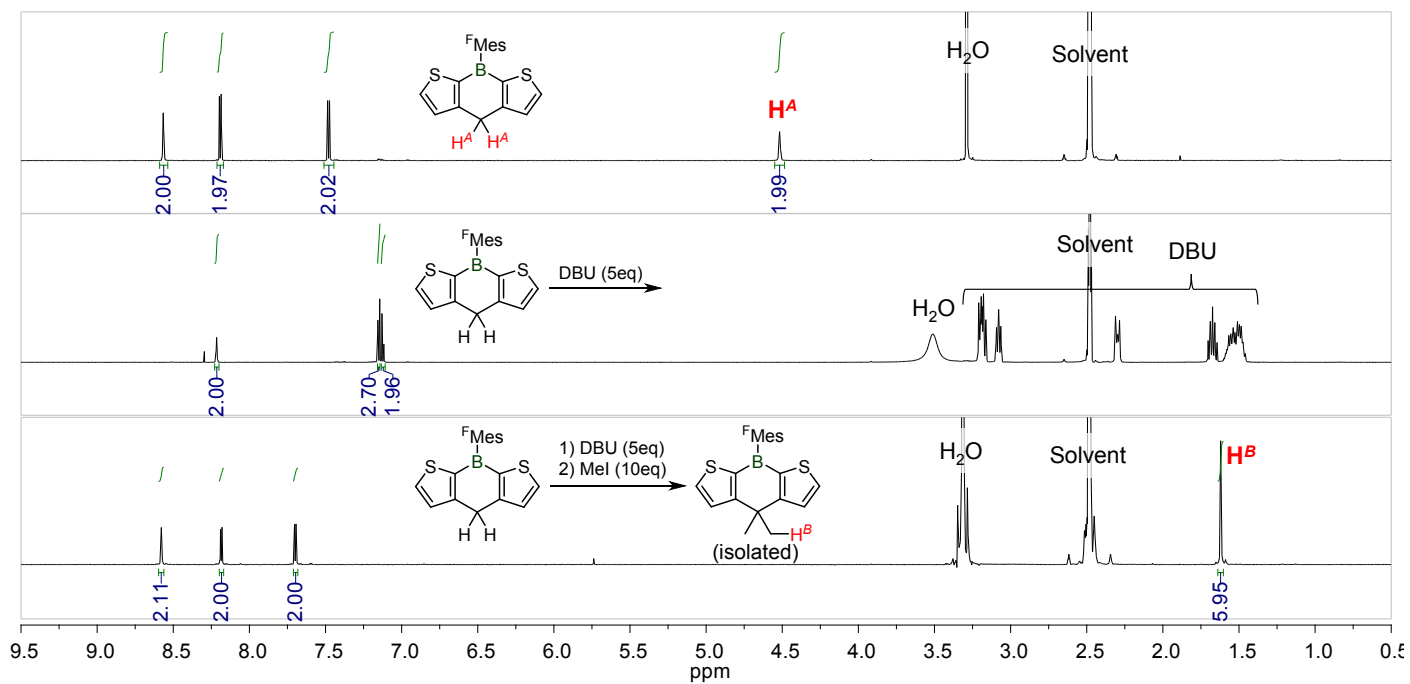

**Figure S3.** Full  $^1\text{H}$  NMR spectra of **1** in the presence and absence of DBU, and methylated product **2** in  $\text{DMSO-}d_6$ .

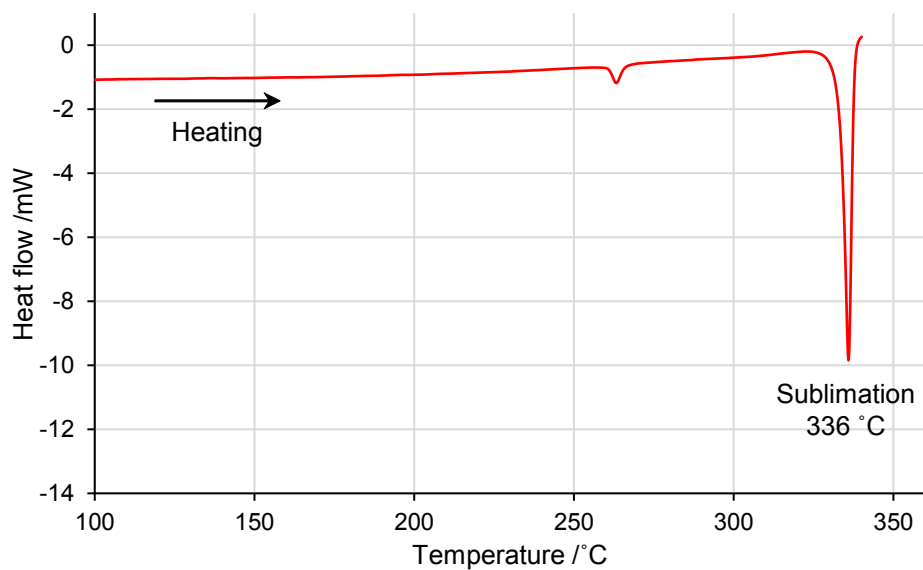

**Figure S4.** DSC curve of **dDTCB** at a heating rate of  $10\text{ }^{\circ}\text{C min}^{-1}$ .

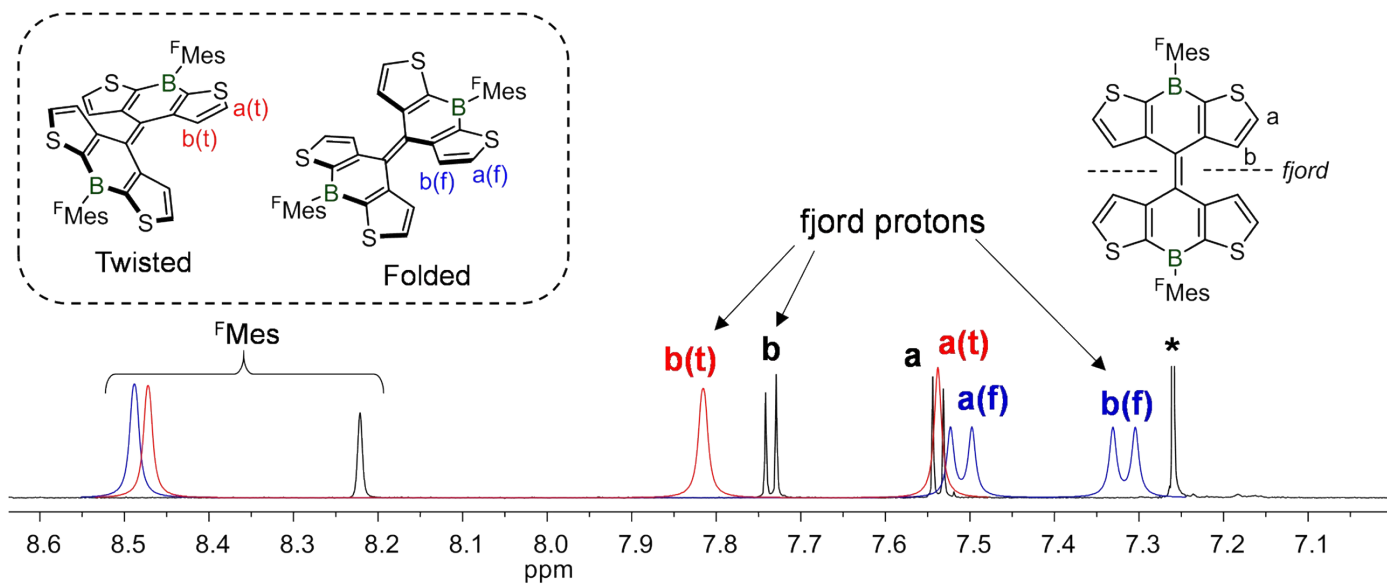

**Figure S5.** Experimental  $^1\text{H}$  NMR spectrum of **dDTCB** in  $\text{CDCl}_3$  at room temperature (black) and GIAO-DFT-calculated  $^1\text{H}$  NMR spectra of twisted (red) and folded (blue) conformers of **dDTCB** at the B3LYP/6-311+G(2d,p) level.

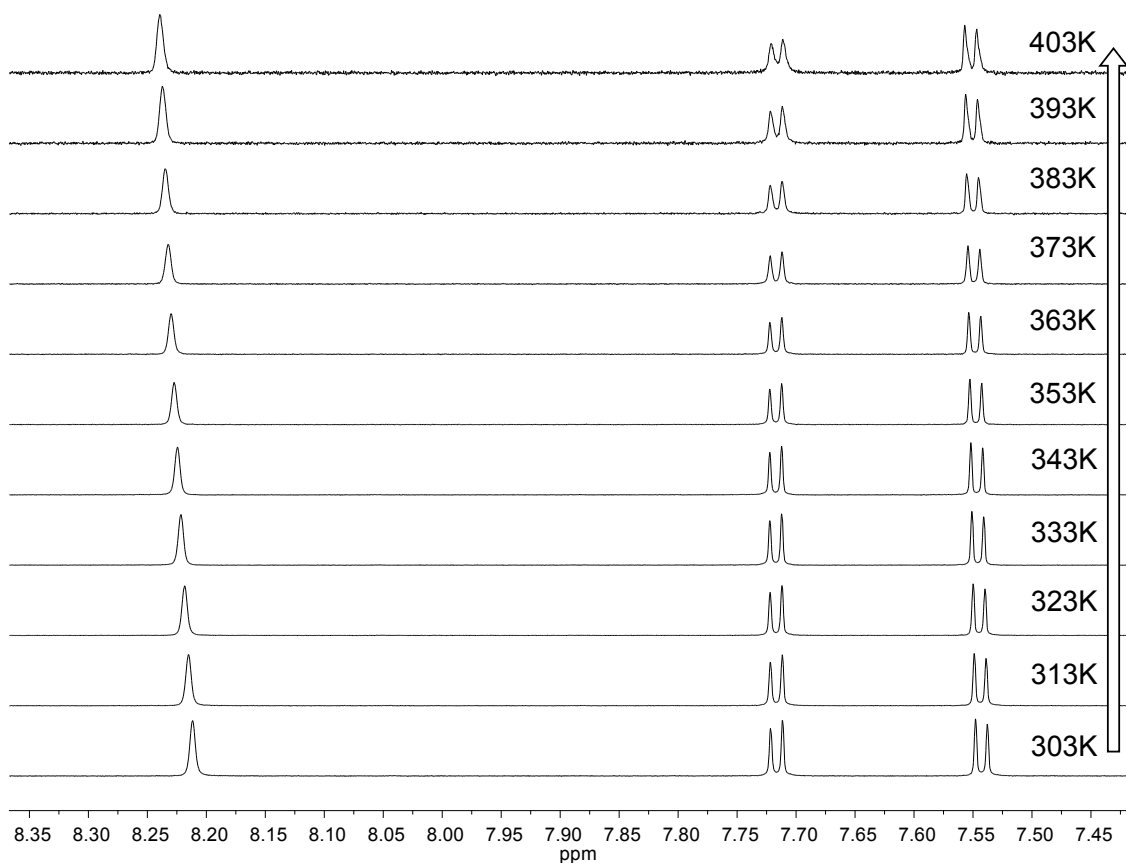

**Figure S6.** Variable temperature  $^1\text{H}$  NMR spectra of **dDTCB** in  $\text{C}_2\text{D}_2\text{Cl}_4$ .

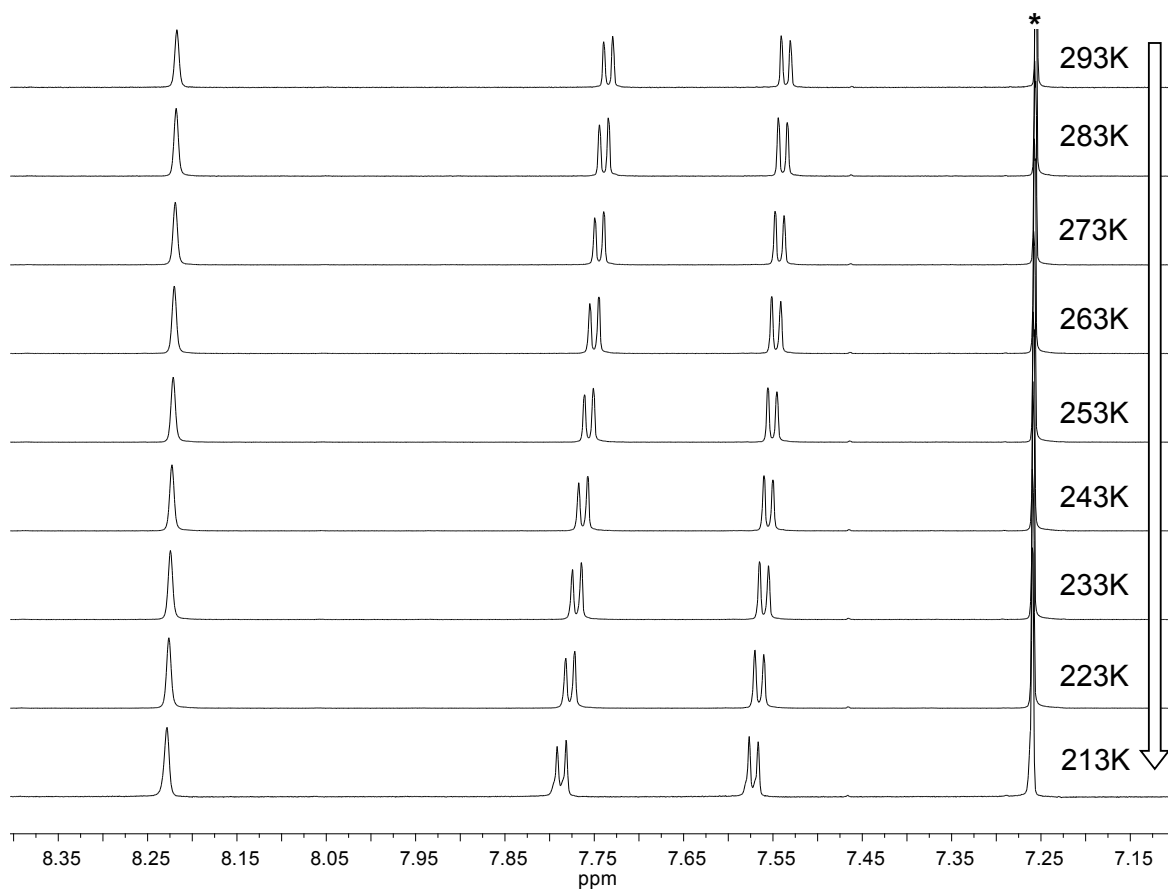

**Figure S7.** Variable temperature  $^1\text{H}$  NMR spectra of **dDTCB** in  $\text{CDCl}_3$ .

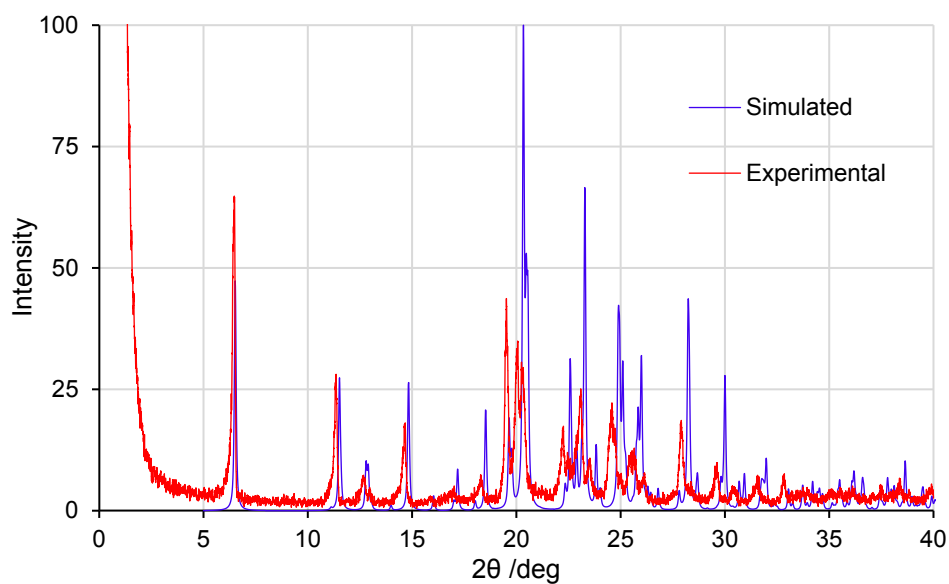

**Figure S8.** XRD patterns of a powder sample recorded at room temperature and simulated patterns from the single crystal XRD measured at 77K for **dDTCB**.

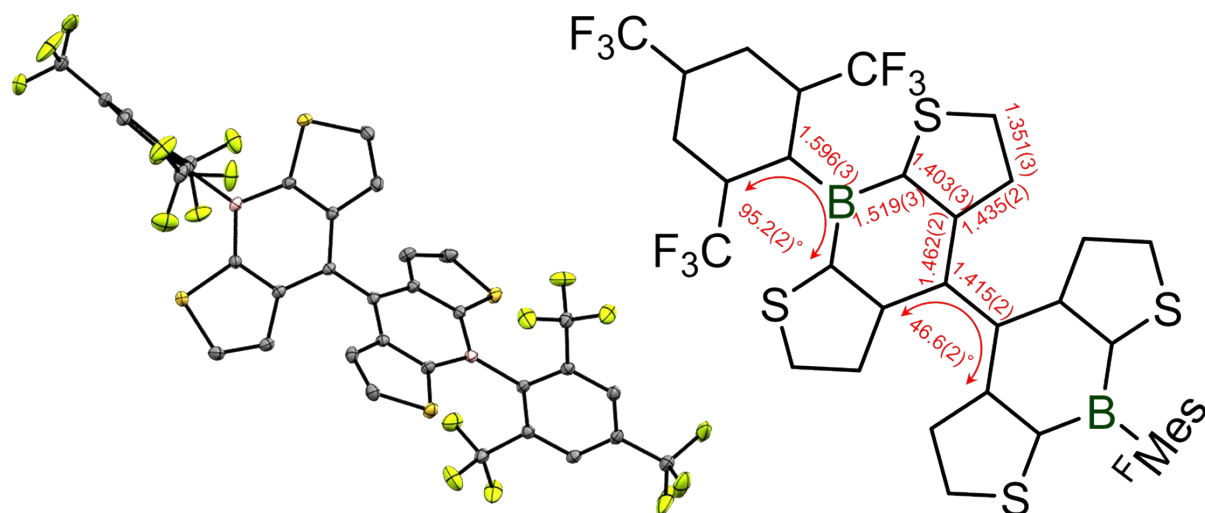

**Figure S9.** Crystal structure of **dDTCB** obtained at 123 K. Thermal ellipsoids are at the 50% probability level. Hydrogen atoms are omitted for clarity.

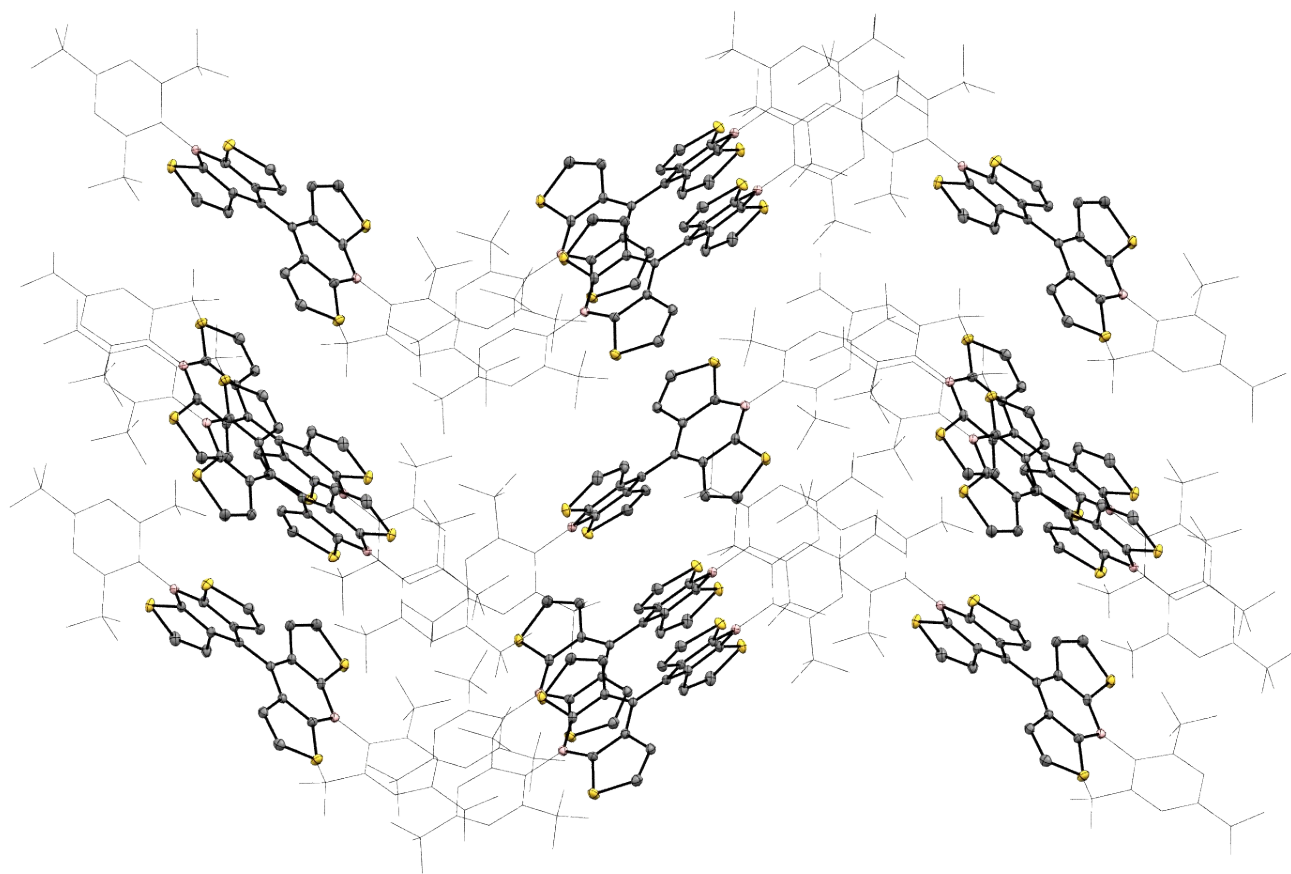

**Figure S10.** Crystal packing structure of **dDTCB** obtained at 123 K. Thermal ellipsoids are at the 50% probability level. Hydrogen atoms are omitted for clarity. <sup>F</sup>Mes groups are shown in wireframe style.

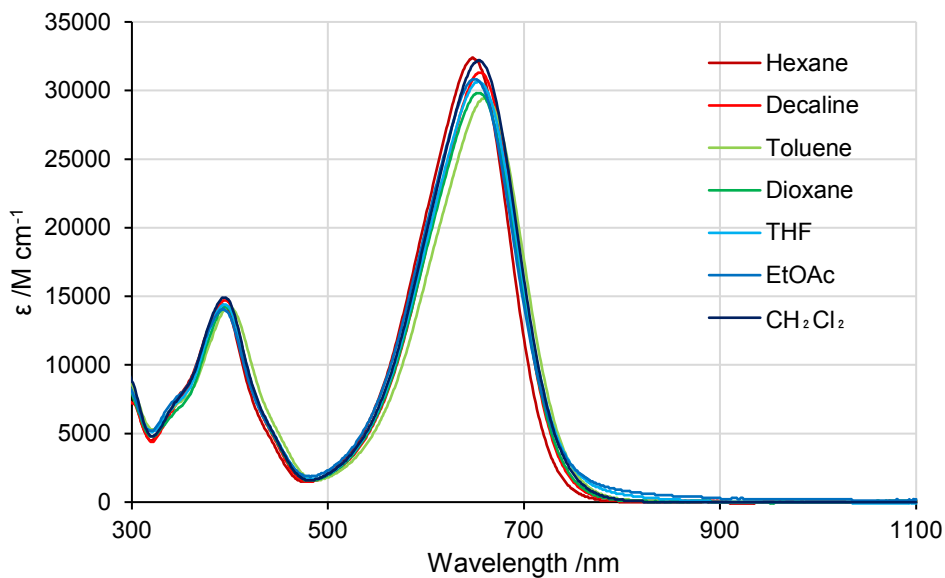

**Figure S11.** Absorption spectra of **dDTCB** in relatively non-polar solvents at room temperature.

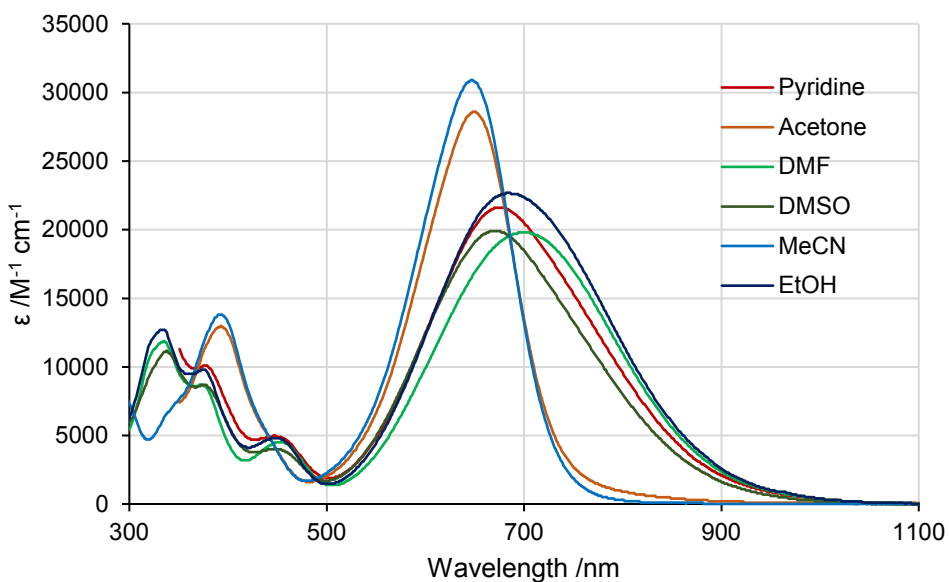

**Figure S12.** Absorption spectra of **dDTCB** in highly polar solvents at room temperature.

**Table S1.** Absorption maxima and coefficient of **ddTCB** in various solvents.

| Solvent  | $\lambda_{\max}$ /nm | $\epsilon / 10^4 \text{ M}^{-1} \text{ cm}^{-1}$ |
|----------|----------------------|--------------------------------------------------|
| Hexane   | 648                  | 3.2                                              |
| Decaline | 657                  | 3.1                                              |
| Toluene  | 661                  | 3.0                                              |
| Dioxane  | 656                  | 3.0                                              |
| THF      | 654                  | 3.1                                              |
| EtOAc    | 652                  | 3.1                                              |
| Pyridine | 681                  | 2.2                                              |
| DCM      | 655                  | 3.2                                              |
| Acetone  | 651                  | 2.9                                              |
| DMF      | 706                  | 2.0                                              |
| DMSO     | 676                  | 2.0                                              |
| ACN      | 648                  | 3.1                                              |
| EtOH     | 686                  | 2.3                                              |

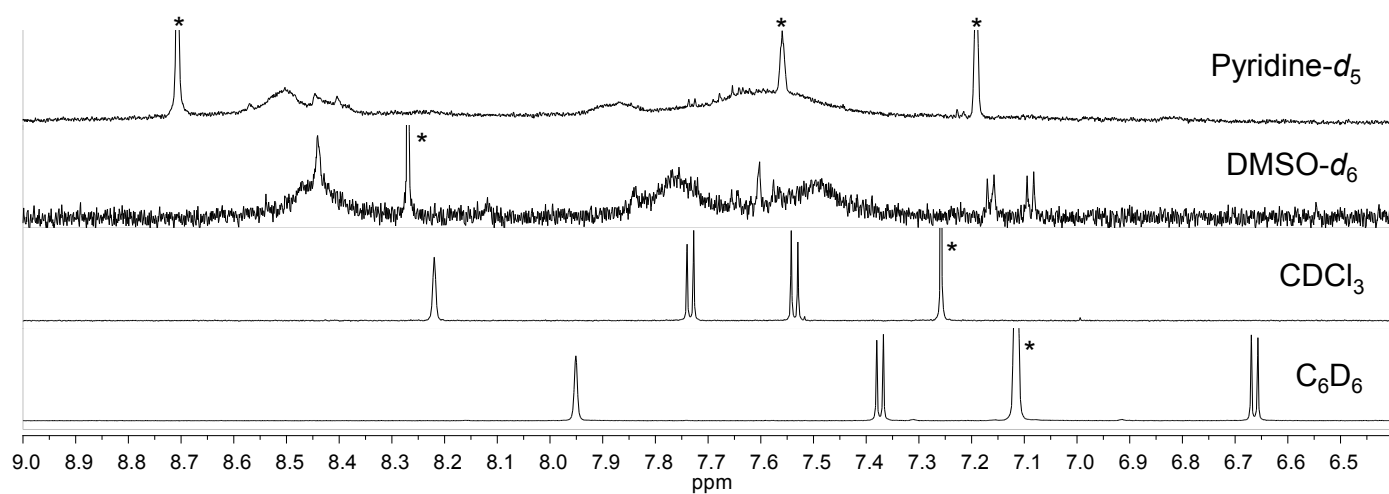

**Figure S13.**  $^1\text{H}$  NMR spectra of **ddTCB** in various *d*-solvents at room temperature. The solvent peaks are denoted by asterisk.

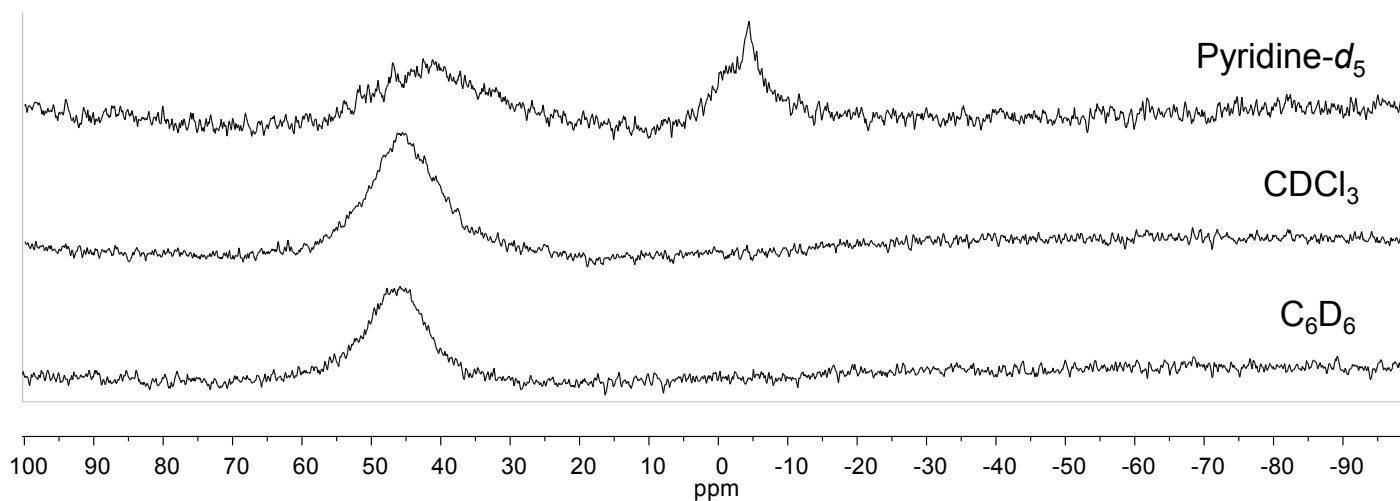

**Figure S14.**  $^{11}\text{B}$  NMR spectra of **dDTCB** in various  $d$ -solvents at room temperature.

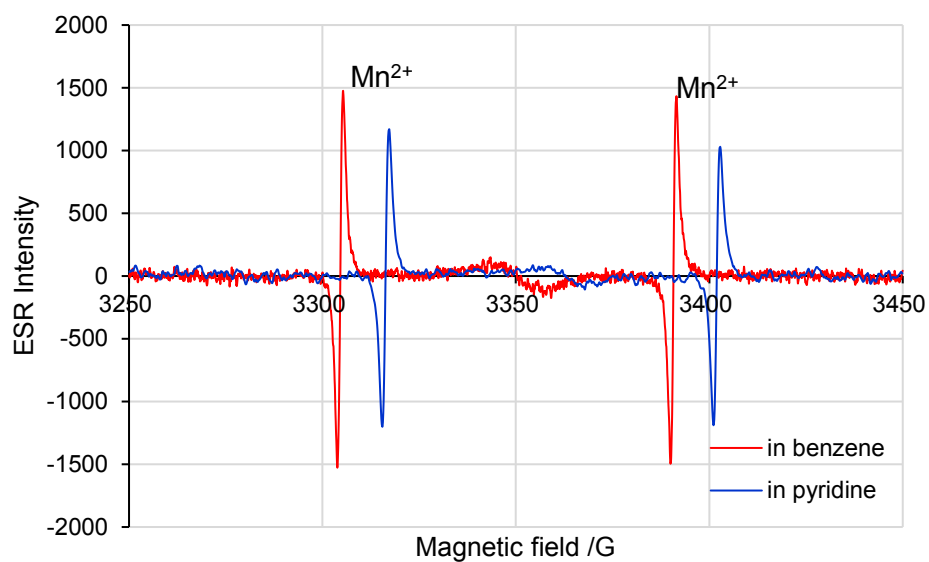

**Figure S15.** ESR spectra of **dDTCB** in benzene and in pyridine at room temperature. The sharp signals correspond to  $\text{Mn}^{2+}$  reference.



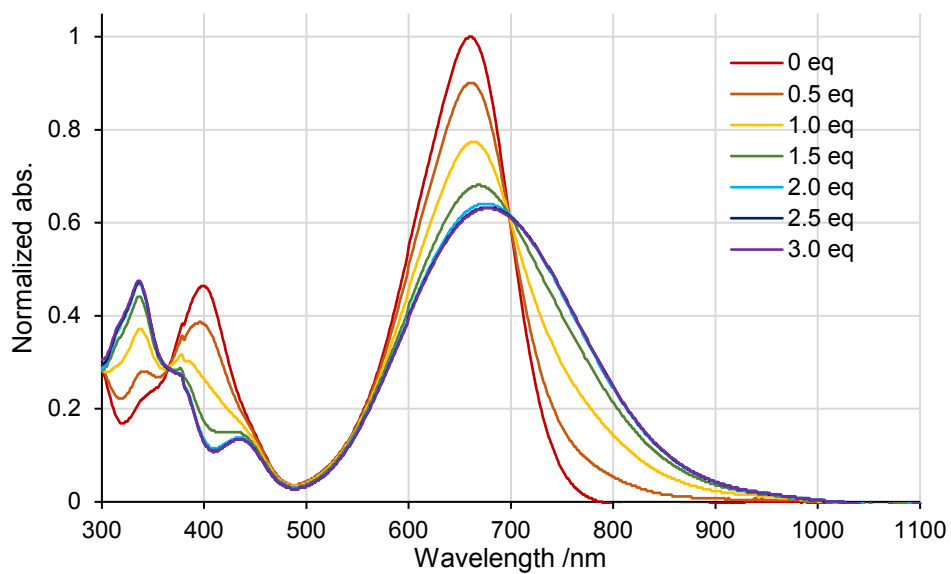

**Figure S16.** Absorption spectra for titrations of **dDTCB** with TBACN in toluene.

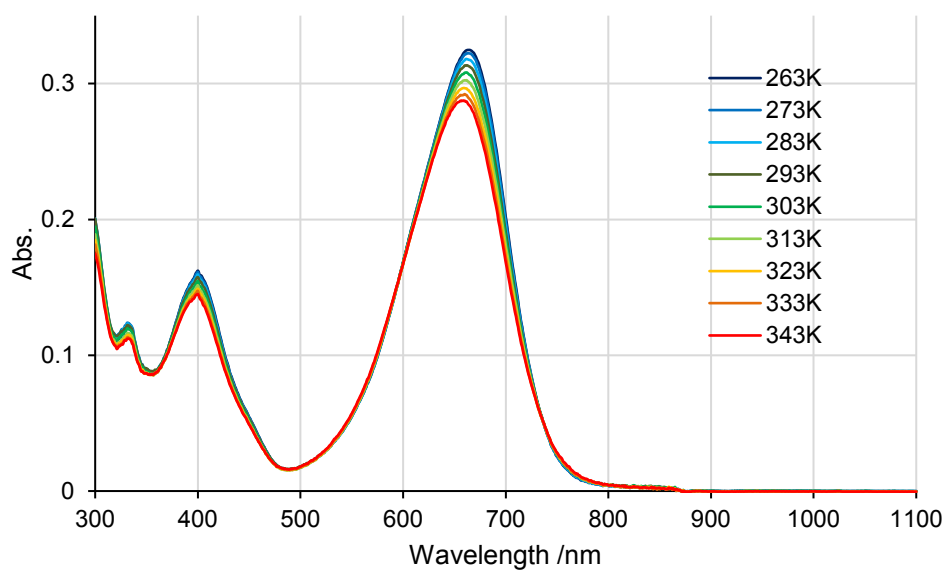

**Figure S17.** Absorption spectra of **dDTCB** in toluene at variable temperatures.

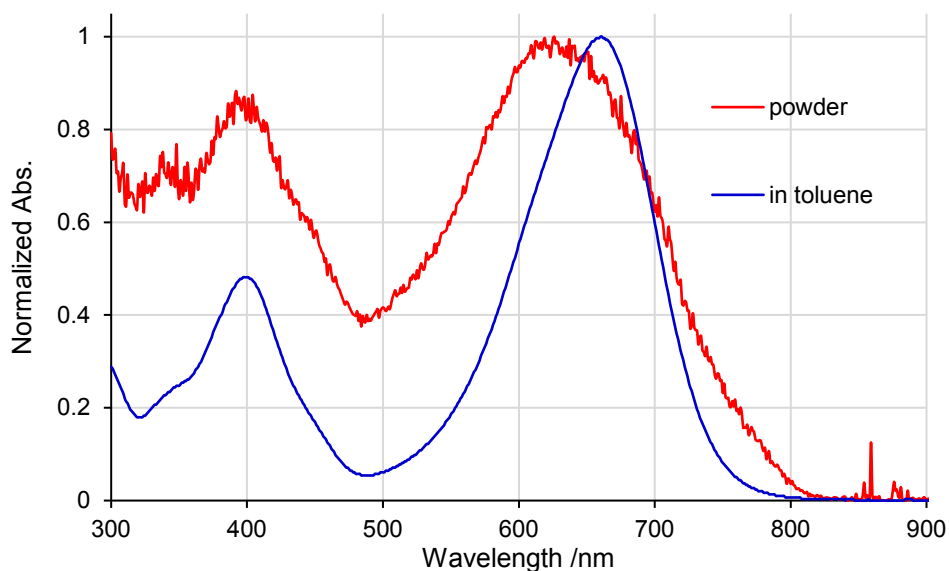

**Figure S18.** Normalized absorption spectra of **dDTCB** in toluene and as solids.

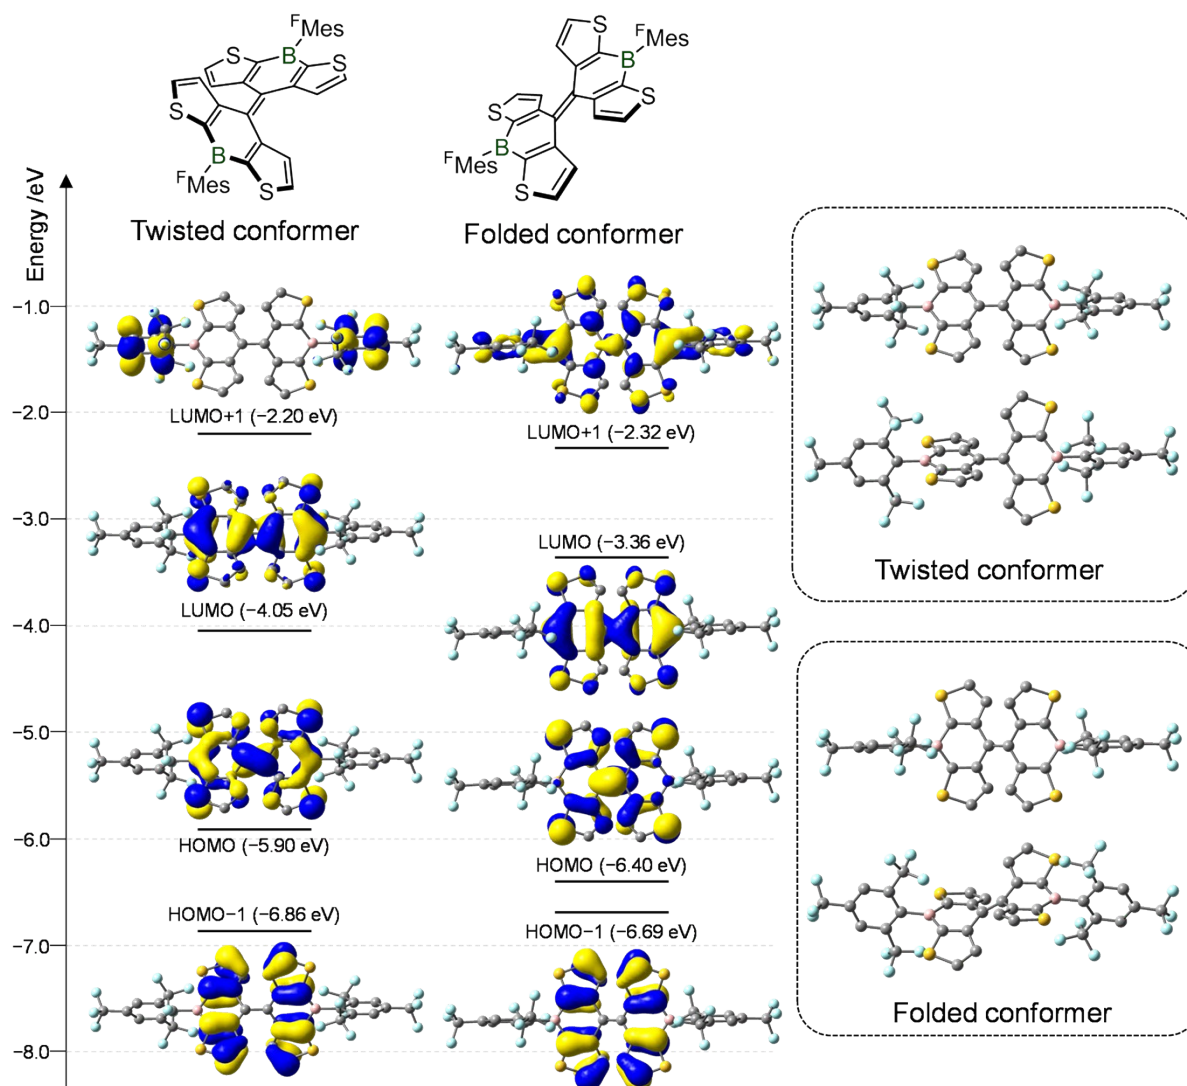

**Figure S19.** DFT-calculated Kohn–Sham orbitals of the two conformers of **dDTCB** at the B3LYP/6-311+G(d,p) level (isovalue = 0.03). Hydrogen atoms are omitted for clarity.

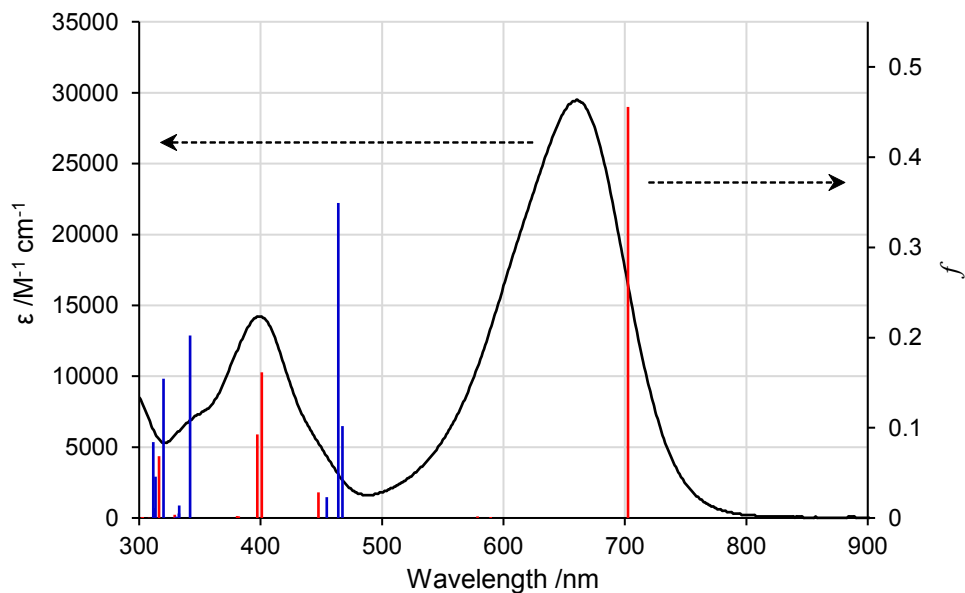

**Figure S20.** Experimental absorption spectrum in toluene (black line) and calculated TD-DFT results of twisted (red) and folded (blue) conformers at the B3LYP/6-311+G(d,p) level for **dDTCB**.

**Table S2.** TD-DFT data for the twisted conformer of **dDTCB**.

| Excited state | Composition <sup>a</sup> | CI     | Excitation energy /eV | Wavelength /nm | $f^b$ |
|---------------|--------------------------|--------|-----------------------|----------------|-------|
| S0→S1         | H→L                      | 0.717  | 1.77                  | 702            | 0.46  |
|               | H→L                      | -0.156 |                       |                |       |
| S0→S5         | H-4→L                    | 0.696  | 3.09                  | 401            | 0.16  |
| S0→S6         | H-5→L                    | 0.696  | 3.12                  | 397            | 0.09  |

<sup>a</sup> H and L denote HOMO and LUMO, respectively. <sup>b</sup> Oscillator strength.

**Table S3.** TD-DFT data for the folded conformer of **ddTCB**.

| Excited state | Composition <sup>a</sup> | CI     | Excitation energy /eV | Wavelength /nm | <i>f</i> <sup>b</sup> |
|---------------|--------------------------|--------|-----------------------|----------------|-----------------------|
| S0→S1         | H-1→L                    | 0.606  | 2.65                  | 467            | 0.10                  |
|               | H→L                      | -0.349 |                       |                |                       |
| S0→S2         | H-1→L                    | 0.348  | 2.67                  | 464            | 0.35                  |
|               | H→L                      | 0.608  |                       |                |                       |
| S0→S6         | H-4→L                    | 0.692  | 3.63                  | 342            | 0.20                  |
| S0→S13        | H-5→L                    | 0.291  | 3.87                  | 320            | 0.15                  |
|               | H-2→L+2                  | -0.144 |                       |                |                       |
|               | H-2→L+4                  | 0.214  |                       |                |                       |
|               | H-1→L+1                  | 0.553  |                       |                |                       |
|               | H-1→L+5                  | 0.154  |                       |                |                       |
| S0→S18        | H-5→L                    | -0.134 | 3.98                  | 312            | 0.08                  |
|               | H-2→L+4                  | 0.396  |                       |                |                       |
|               | H-1→L+1                  | -0.176 |                       |                |                       |
|               | H-1→L+3                  | 0.174  |                       |                |                       |
|               | H-1→L+5                  | 0.499  |                       |                |                       |

<sup>a</sup> H and L denote HOMO and LUMO, respectively. <sup>b</sup> Oscillator strength.

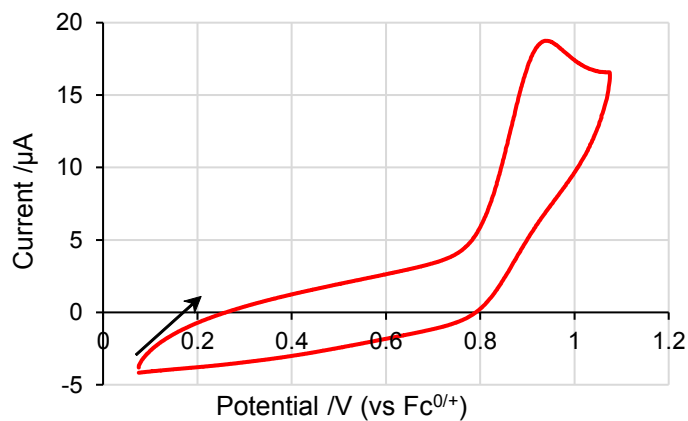**Figure S21.** Anodic cyclic voltammetry data of **ddTCB** in dichloromethane containing 0.1 M Bu<sub>4</sub>NPF<sub>6</sub> at the scan rate of 100 mV s<sup>-1</sup>.

**Table S4.** Optical/electrochemical properties of **dDTCB** in solution.

| $\lambda_{\max}^a$ /nm | $E_{\text{red}}^1$ <sup>b</sup> /V | $E_{\text{red}}^2$ <sup>b</sup> /V | $E_{\text{ox}}$ <sup>c</sup> /V | LUMO <sup>d</sup> /eV | HOMO <sup>e</sup> /eV | $E_g(\text{CV})$ <sup>f</sup> /eV | $E_g(\text{Opt})$ <sup>g</sup> /eV |
|------------------------|------------------------------------|------------------------------------|---------------------------------|-----------------------|-----------------------|-----------------------------------|------------------------------------|
| 661                    | -0.81                              | -1.17                              | 0.79                            | -3.99                 | -5.59                 | 1.60                              | 1.88                               |

<sup>a</sup> Absorption maxima in toluene; <sup>b</sup>  $E_{\text{red}} = 0.5 (E_{\text{pc}} + E_{\text{pa}})$  vs Fc/Fc<sup>+</sup>; <sup>c</sup> Onset potential vs Fc/Fc<sup>+</sup>; <sup>d</sup> Determined as  $-(4.8 - E_{\text{red}}^1)$ ; <sup>e</sup> Determined as  $-(4.8 + E_{\text{ox}})$ ; <sup>f</sup>  $E_g(\text{CV}) = E_{\text{ox}} - E_{\text{red}}^1$ ; <sup>g</sup> Obtained from the absorption onset in toluene.

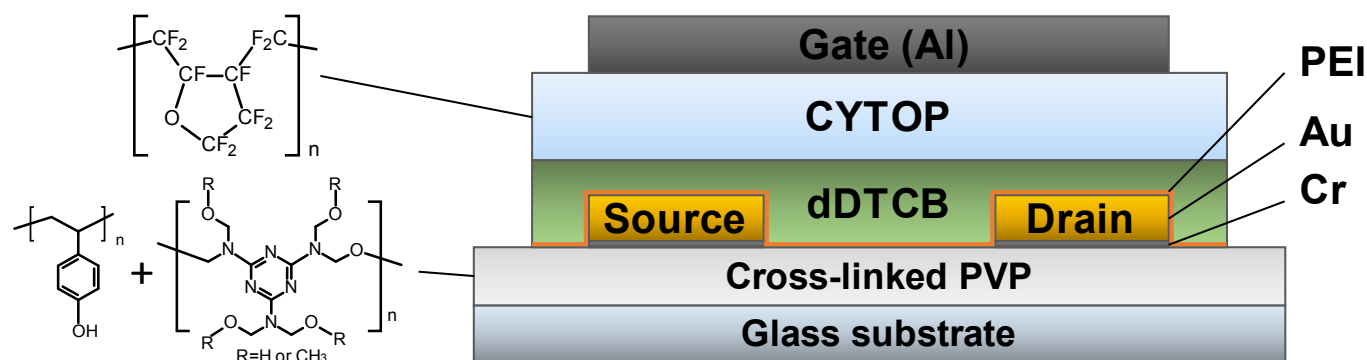

**Figure S22.** Schematic illustration of a top-gate/bottom-contact **dDTCB** OFET, along with the chemical structures of the organic materials.

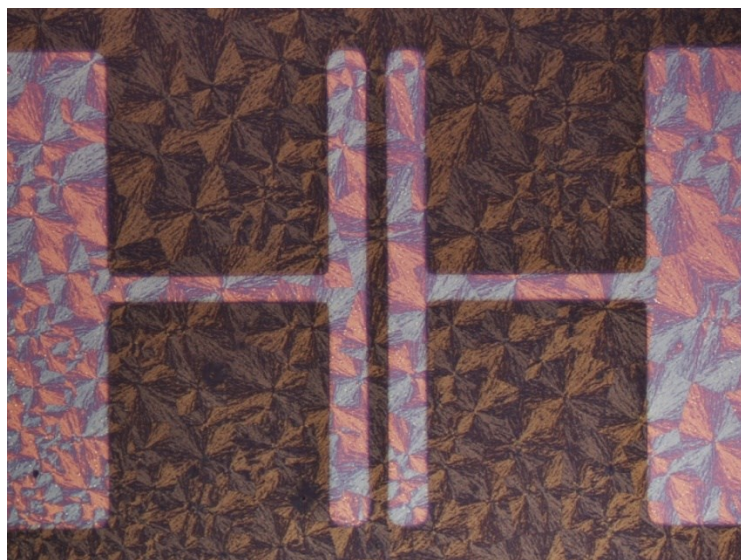

**Figure S23.** Polarized light microscopy image of **dDTCB** thin film coated on glass substrate with source and drain electrodes after annealing at 100 °C for 10 min.

## NMR and MS spectra

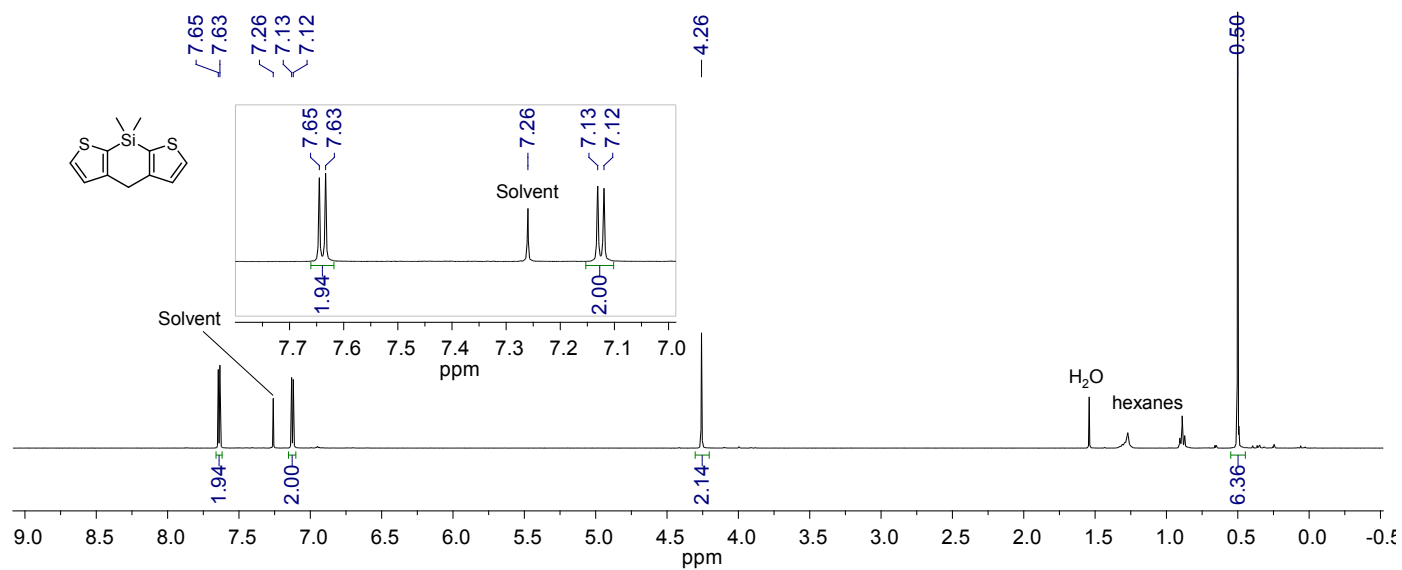

**Figure S24.** <sup>1</sup>H NMR spectrum of 8,8-dimethyl-4,8-dihydrosilino[2,3-*b*:6,5-*b'*]dithiophene in CDCl<sub>3</sub> at room temperature (400 MHz).

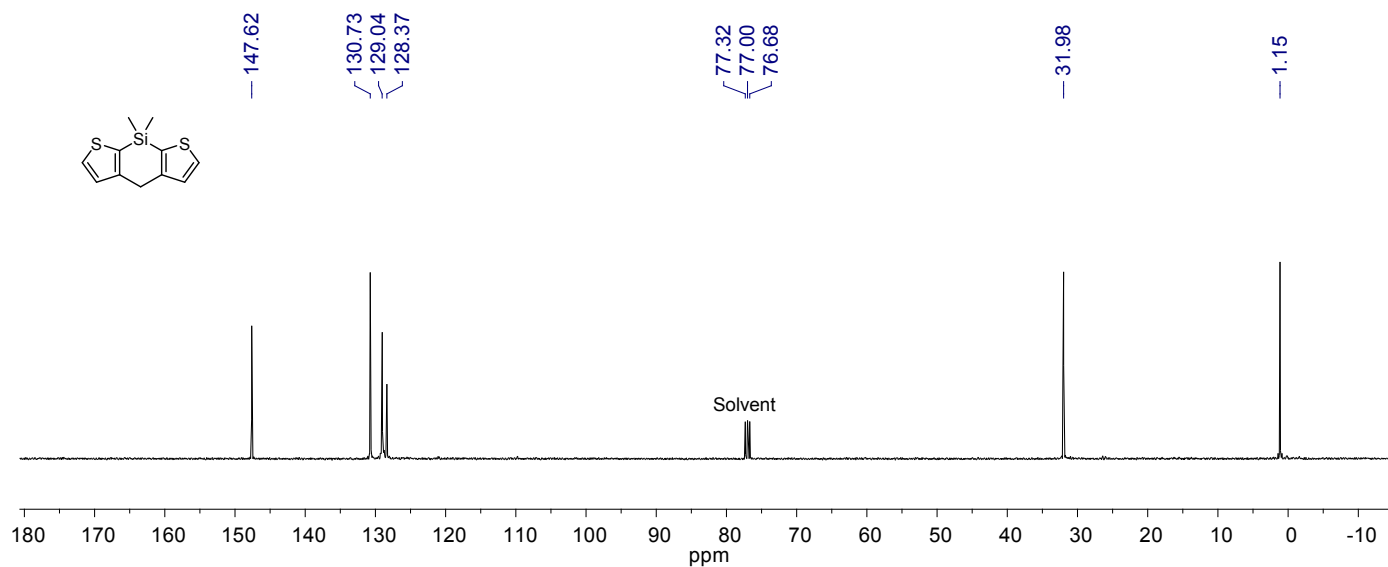

**Figure S25.** <sup>13</sup>C NMR spectrum of 8,8-dimethyl-4,8-dihydrosilino[2,3-*b*:6,5-*b'*]dithiophene in CDCl<sub>3</sub> at room temperature (100 MHz).

200930\_infusion\_02(DTCSI)#28 RT: 0.39 AV: 1 NL: 6.87E7  
T: FTMS + p APCI corona Full ms [100.00-1000.00]

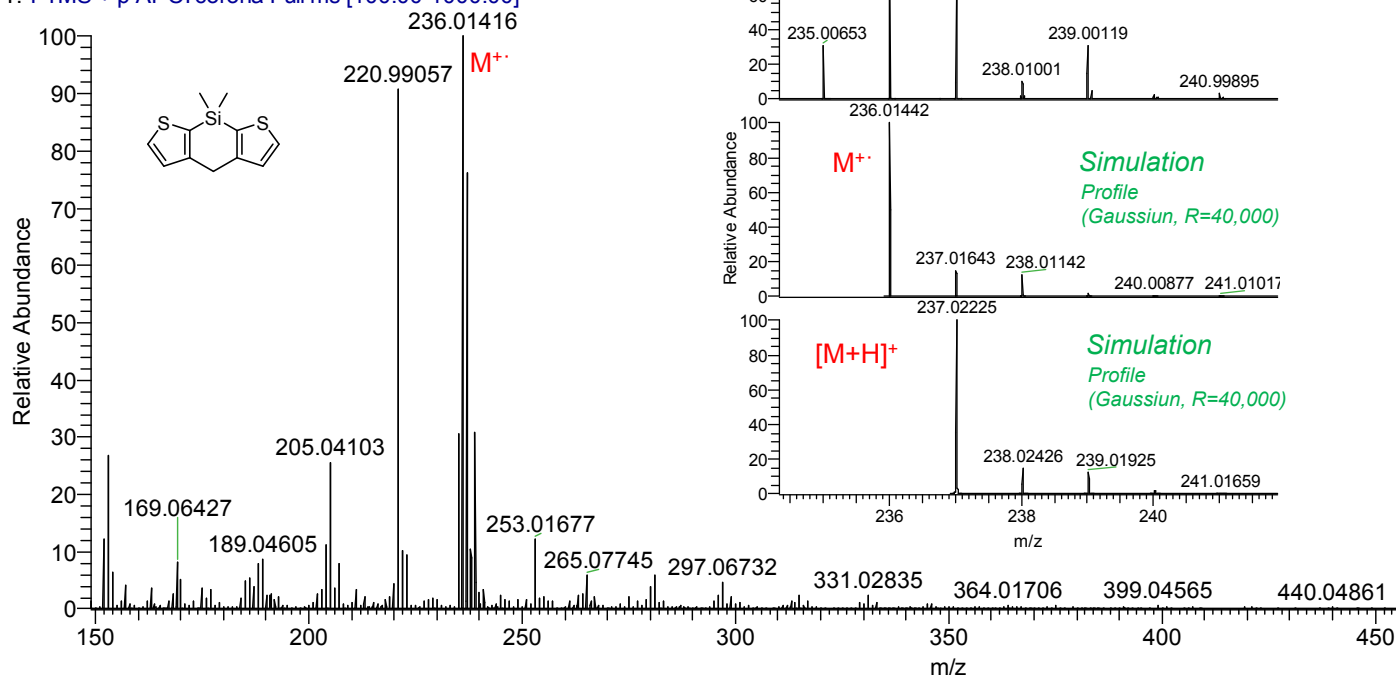

**Figure S26.** APCI mass spectrum of 8,8-dimethyl-4,8-dihydrosilino[2,3-*b*:6,5-*b'*]dithiophene (positive mode).

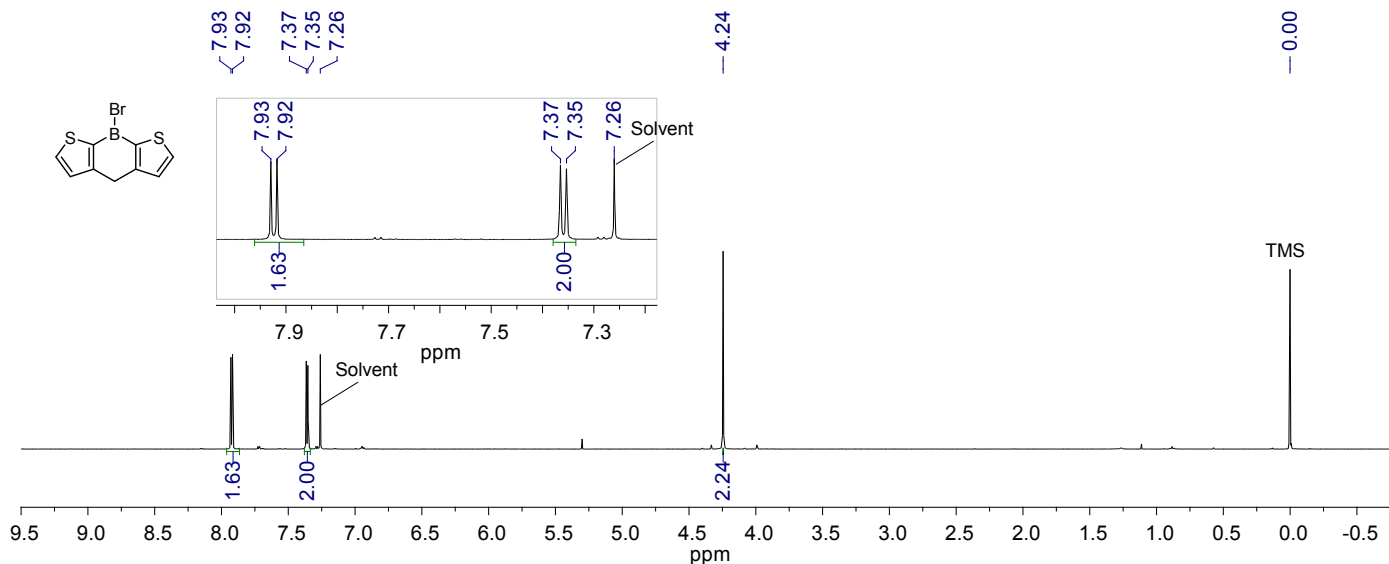

**Figure S27.**  $^1\text{H}$  NMR spectrum of 8-bromo-4,8-dihydroborinino[2,3-*b*:6,5-*b'*]dithiophene in  $\text{CDCl}_3$  at room temperature (400 MHz).

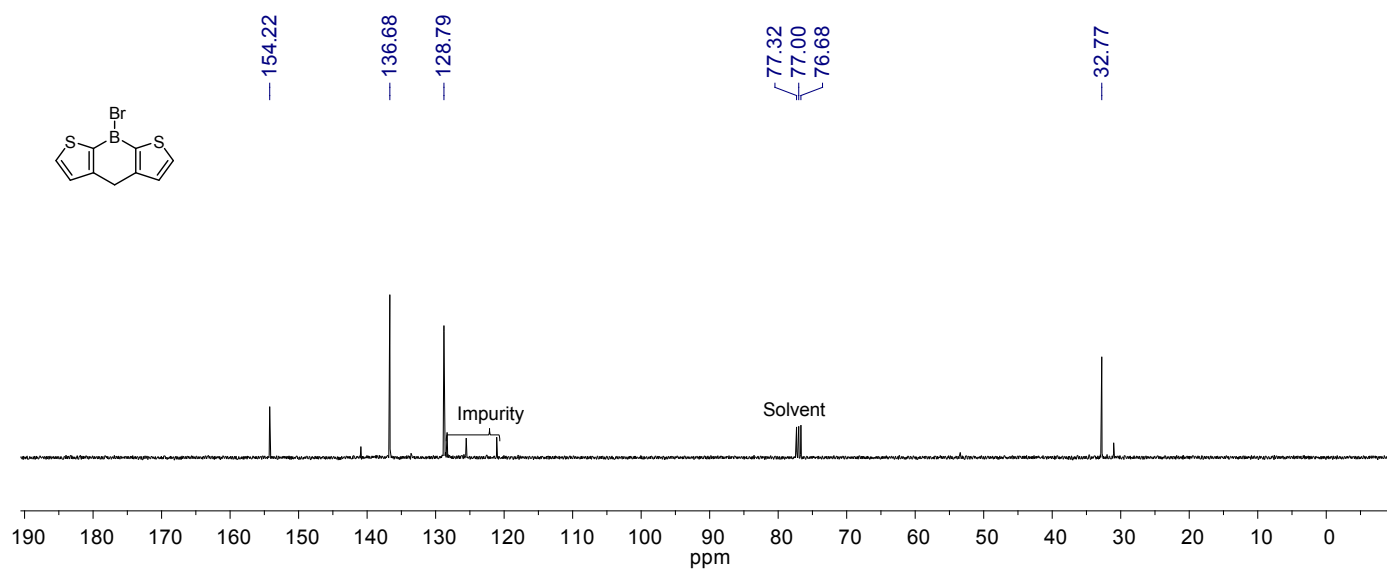

**Figure S28.**  $^{13}\text{C}$  NMR spectrum of 8,8-dimethyl-4,8-dihydro-silino[2,3-*b*:6,5-*b'*]dithiophene in  $\text{CDCl}_3$  at room temperature (100 MHz).

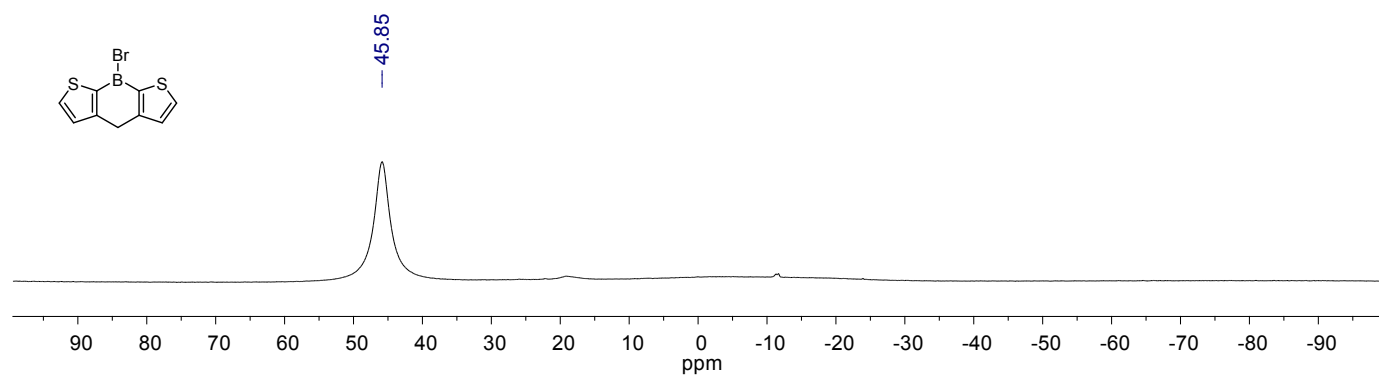

**Figure S29.**  $^{11}\text{B}$  NMR spectrum of 8,8-dimethyl-4,8-dihydro-silino[2,3-*b*:6,5-*b'*]dithiophene in  $\text{CDCl}_3$  at room temperature (128 MHz).



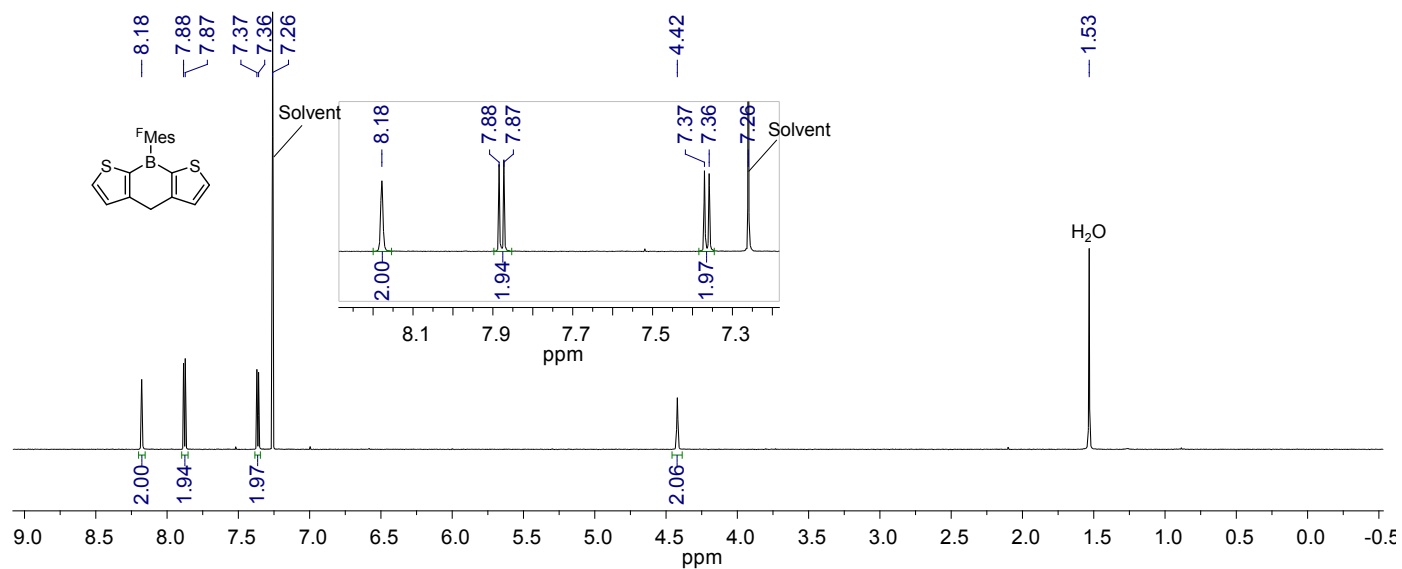

**Figure S30.** <sup>1</sup>H NMR spectrum of **1** in CDCl<sub>3</sub> at room temperature (400 MHz).

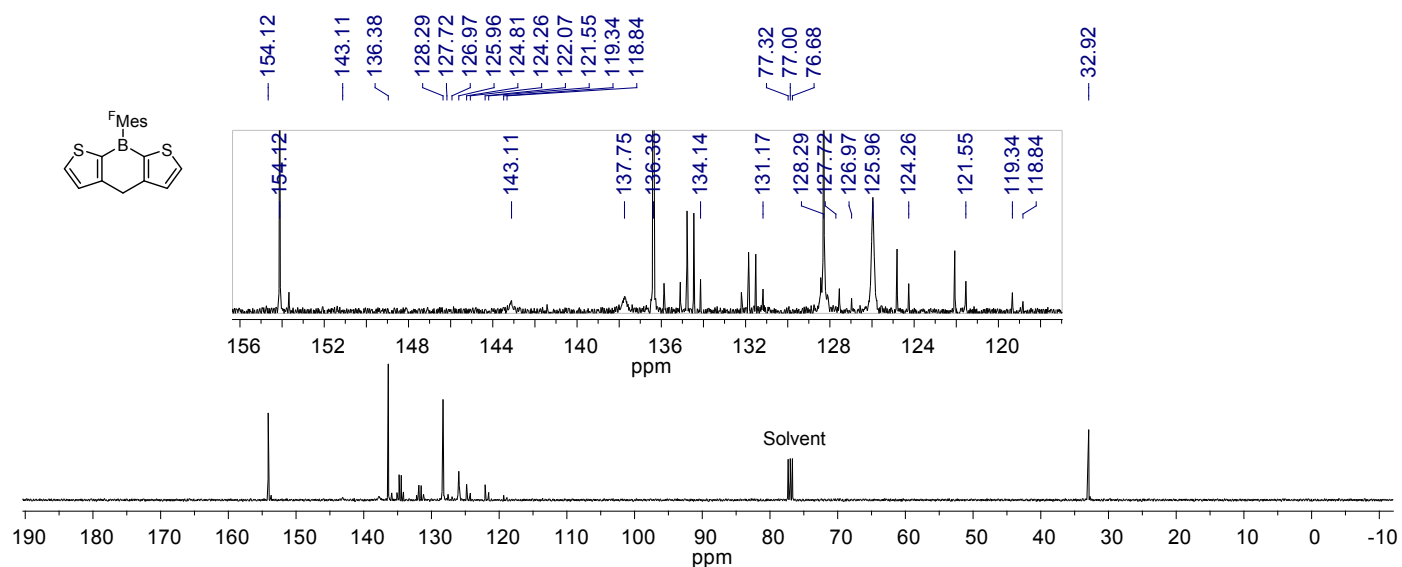

**Figure S31.** <sup>13</sup>C NMR spectrum of **1** in CDCl<sub>3</sub> at room temperature (100 MHz).

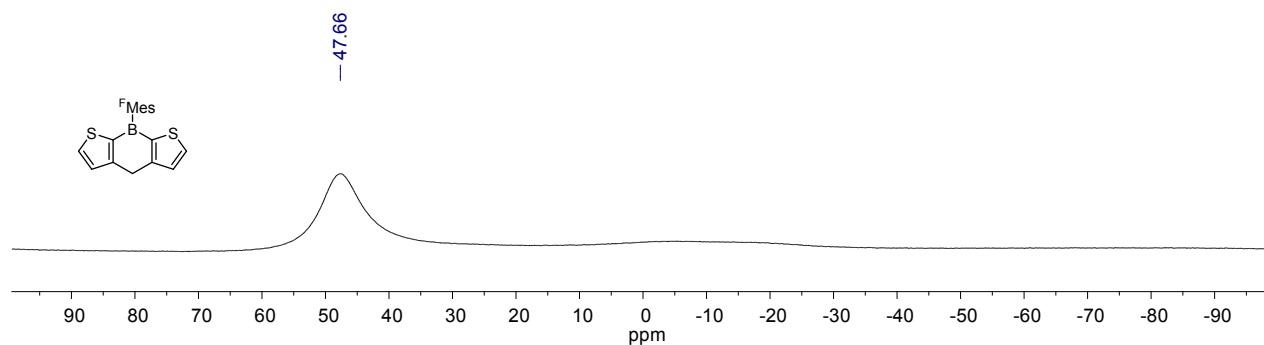

**Figure S32.** <sup>11</sup>B NMR spectrum of **1** in CDCl<sub>3</sub> at room temperature (128 MHz).

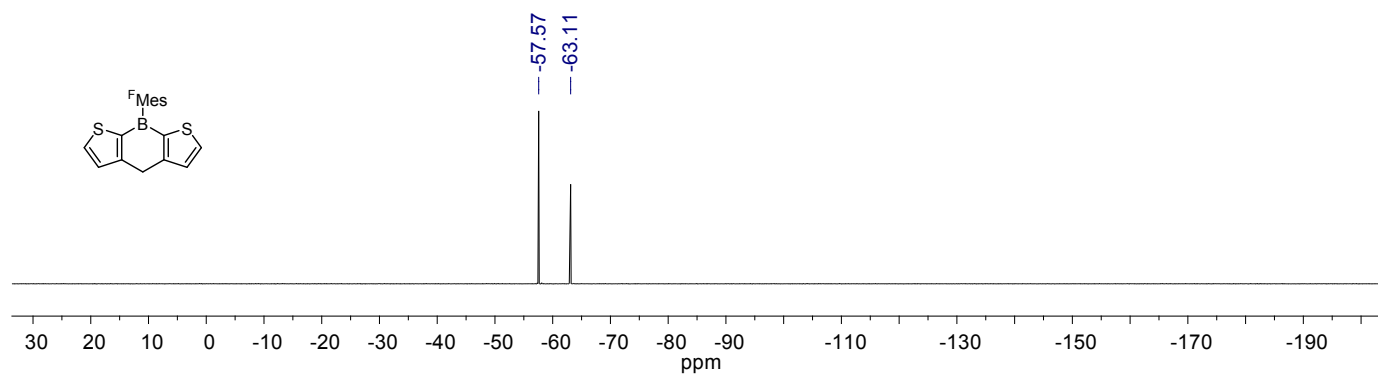

**Figure S33.**  $^{19}\text{F}$  NMR spectrum of **1** in  $\text{CDCl}_3$  at room temperature (376 MHz).

200930\_infusion\_04(DTCB) #11 RT: 0.15 AV: 1 NL: 1.48E8  
T: FTMS + p APCI corona Full ms [100.00-1000.00]

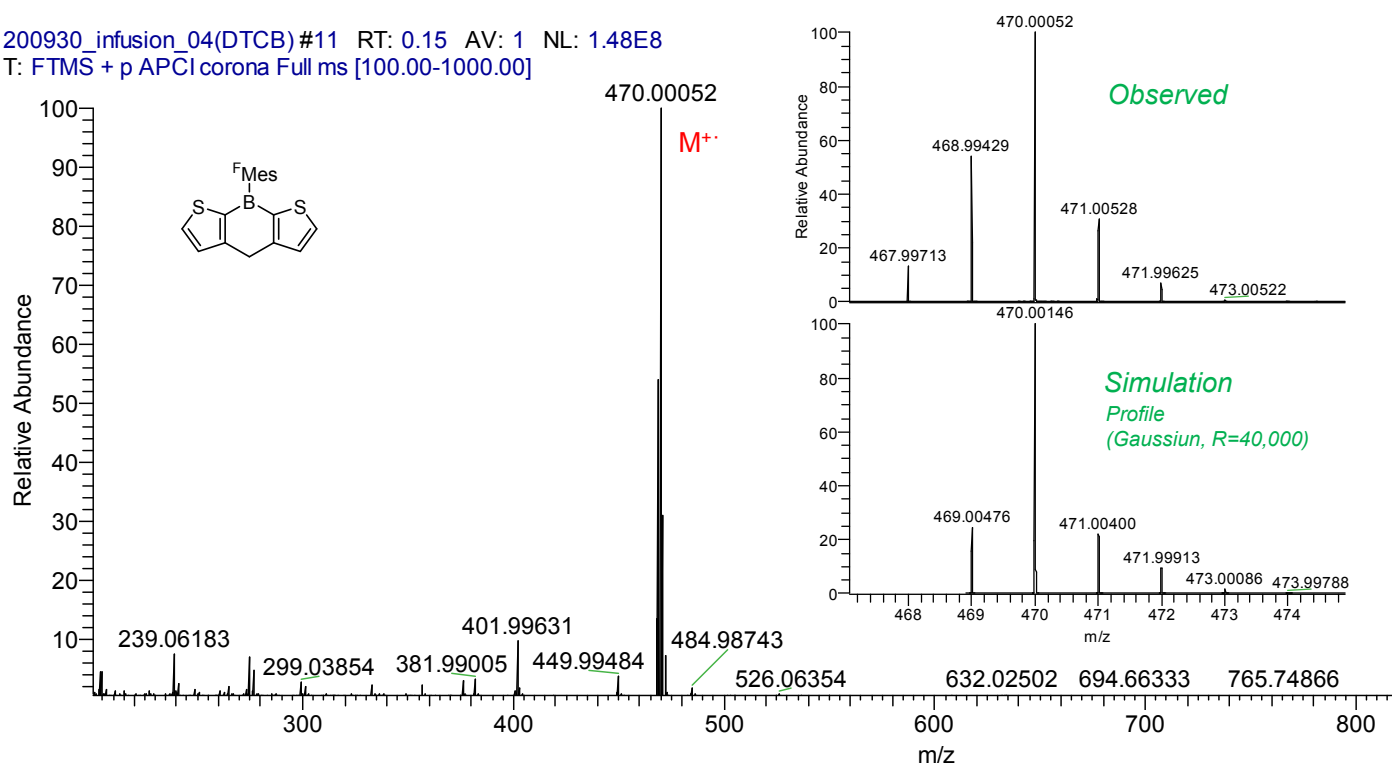

**Figure S34.** APCI mass spectrum of **1** (positive mode).

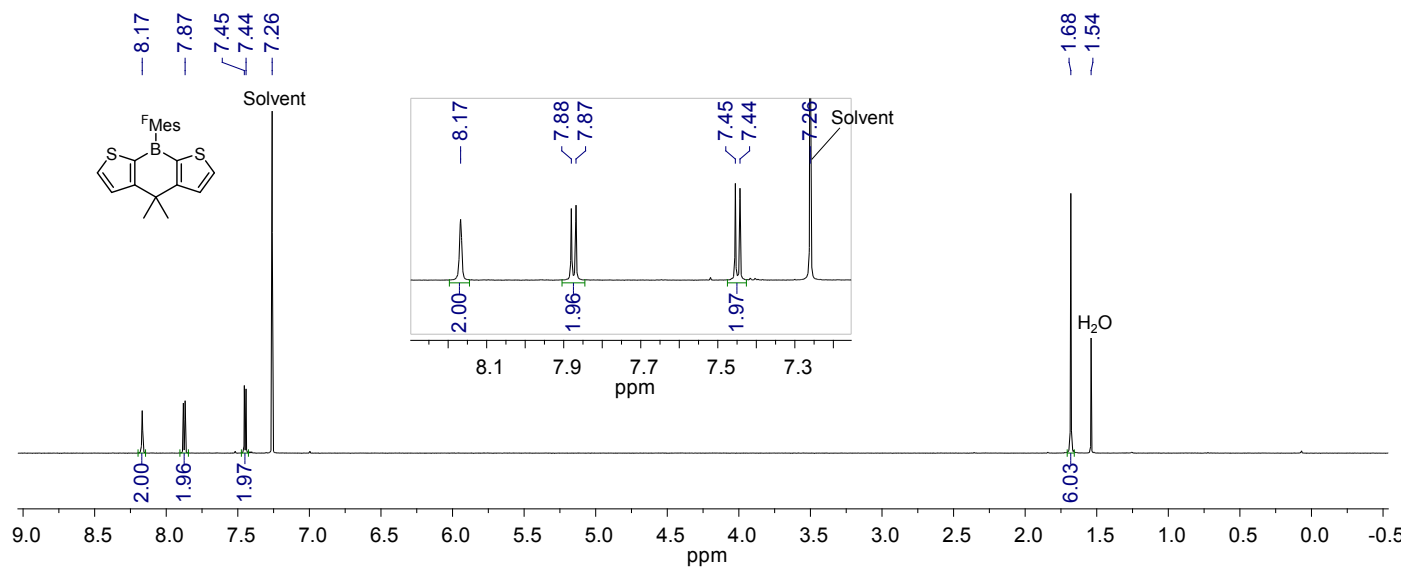

**Figure S35.** <sup>1</sup>H NMR spectrum of **2** in CDCl<sub>3</sub> at room temperature (400 MHz).

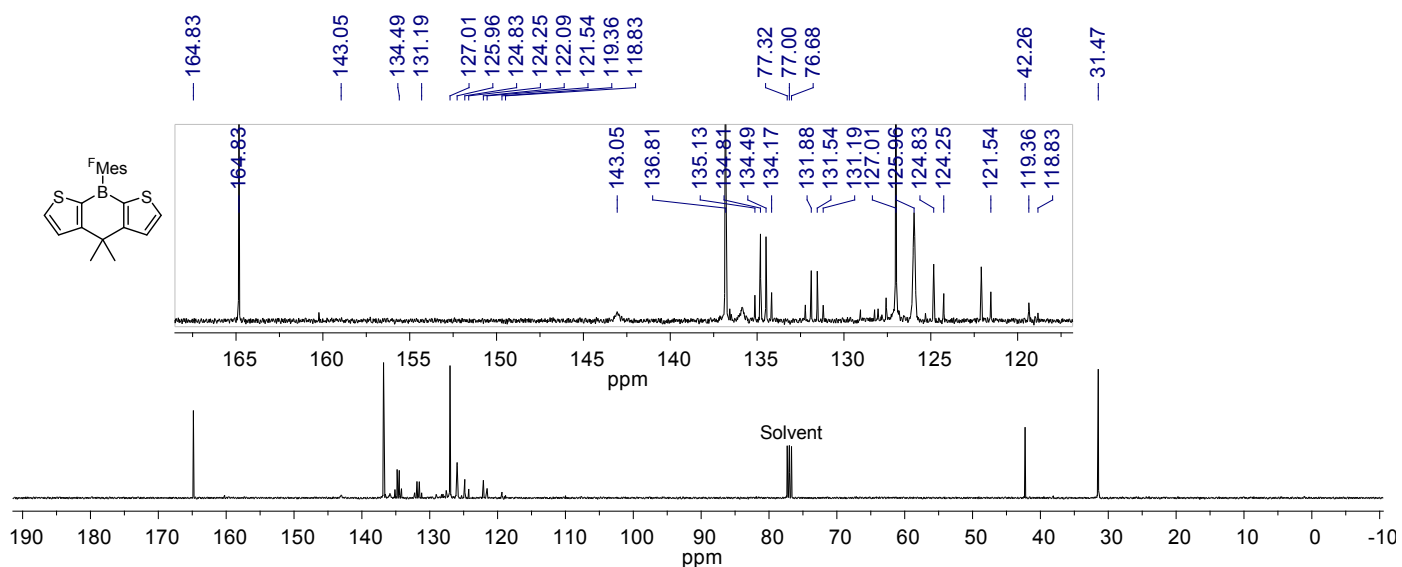

**Figure S36.** <sup>13</sup>C NMR spectrum of **2** in CDCl<sub>3</sub> at room temperature (100 MHz).

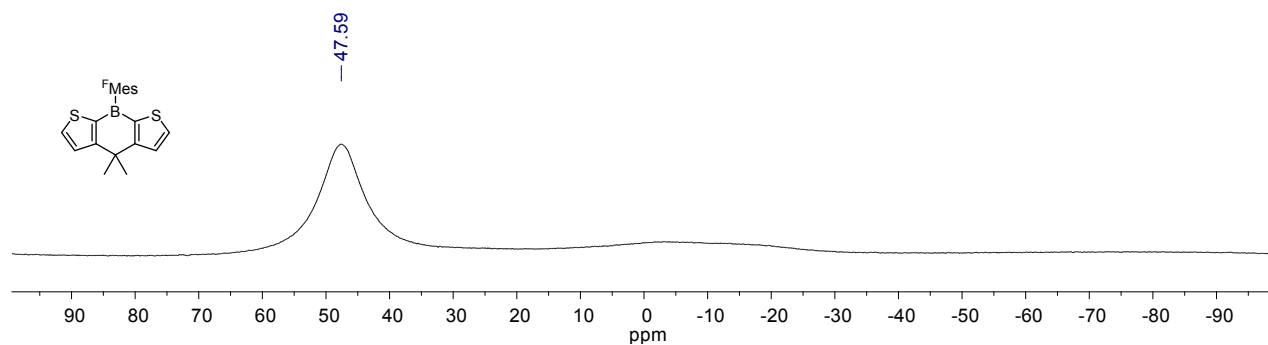

**Figure S37.** <sup>11</sup>B NMR spectrum of **2** in CDCl<sub>3</sub> at room temperature (128 MHz).

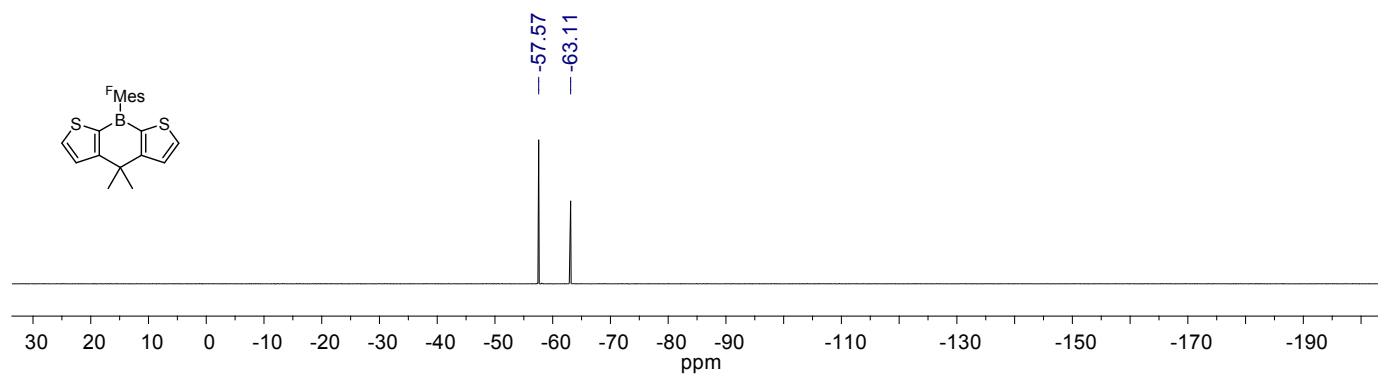

**Figure S38.**  $^{19}\text{F}$  NMR spectrum of **2** in CDCl<sub>3</sub> at room temperature (376 MHz).

200930\_infusion\_06(DTCB-Me)#6 RT: 0.08 AV: 1 NL: 2.85E7  
T: FTMS + p APCI corona Full ms [150.00-2000.00]

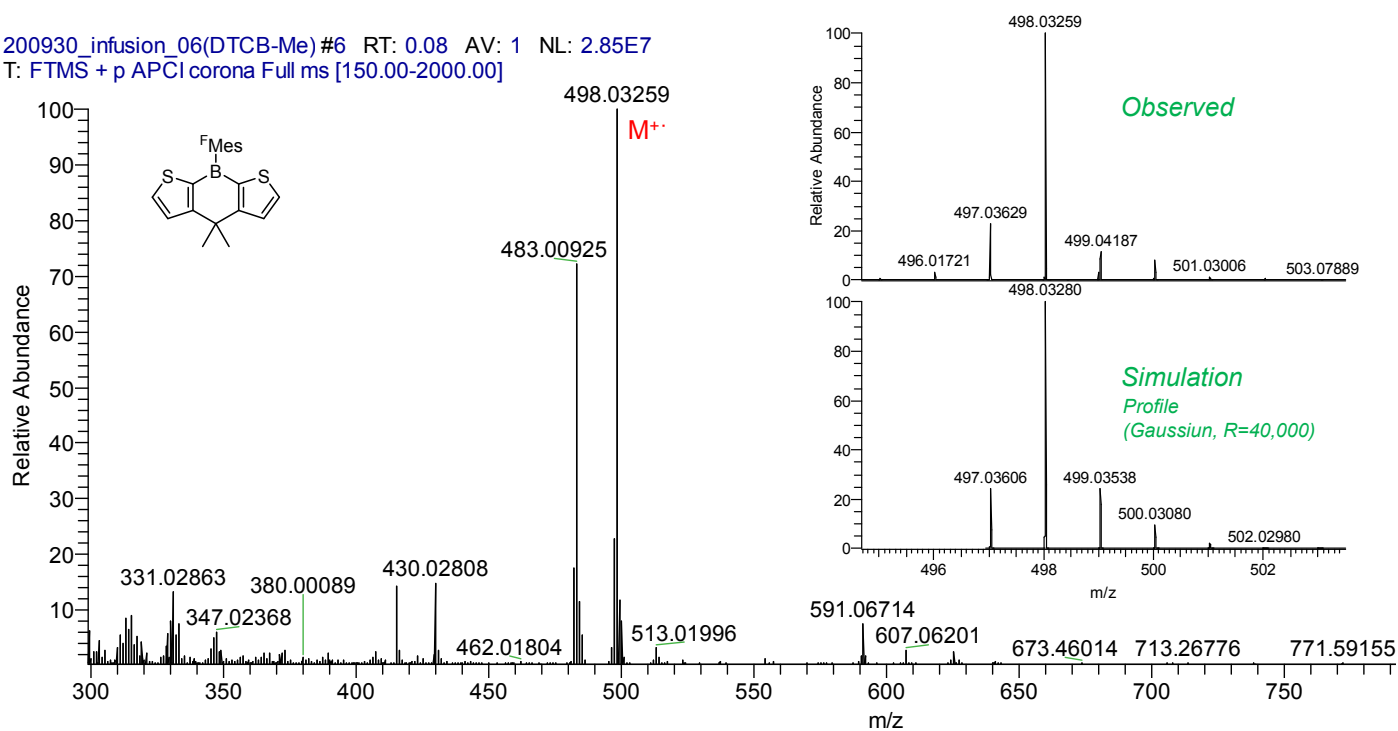

**Figure S39.** APCI mass spectrum of **2** (positive mode).

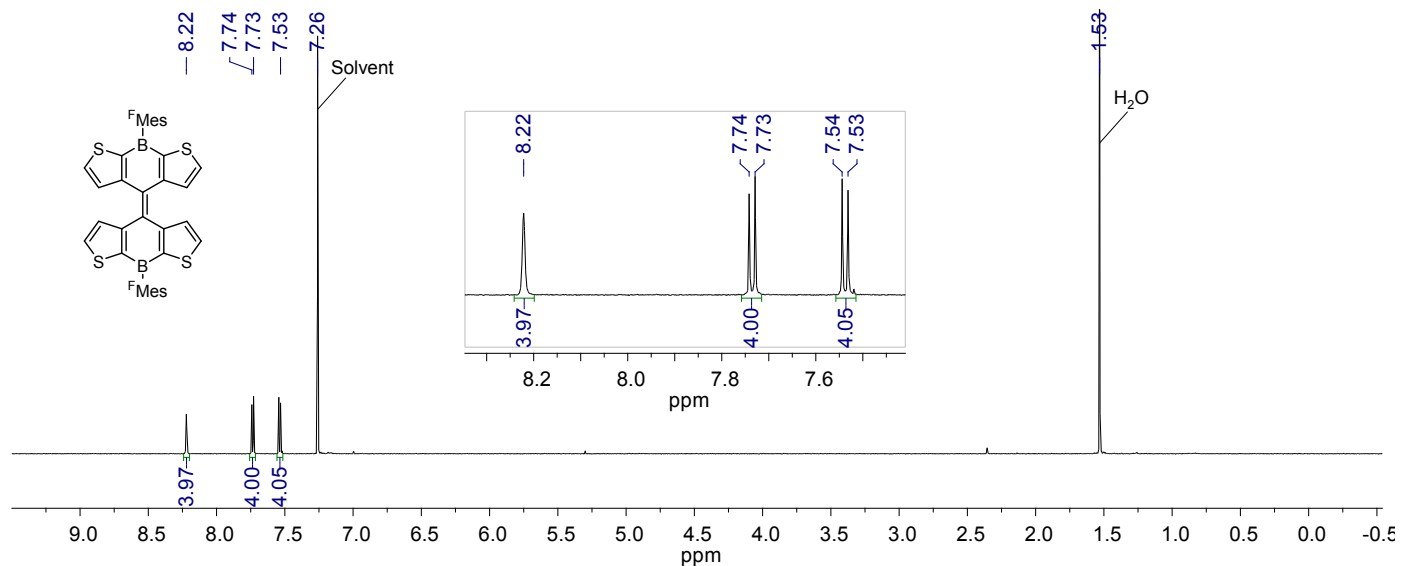

**Figure S40.**  $^1\text{H}$  NMR spectrum of dDTCB in  $\text{CDCl}_3$  at room temperature (400 MHz).

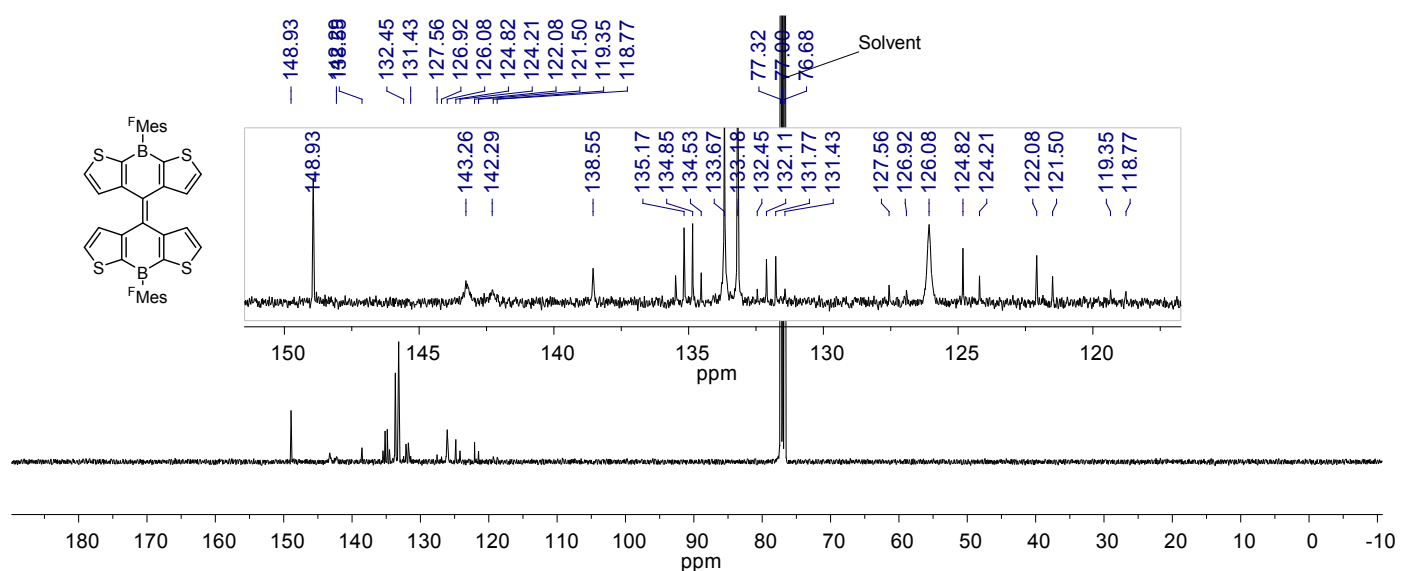

**Figure S41.**  $^{13}\text{C}$  NMR spectrum of dDTCB in  $\text{CDCl}_3$  at room temperature (100 MHz).

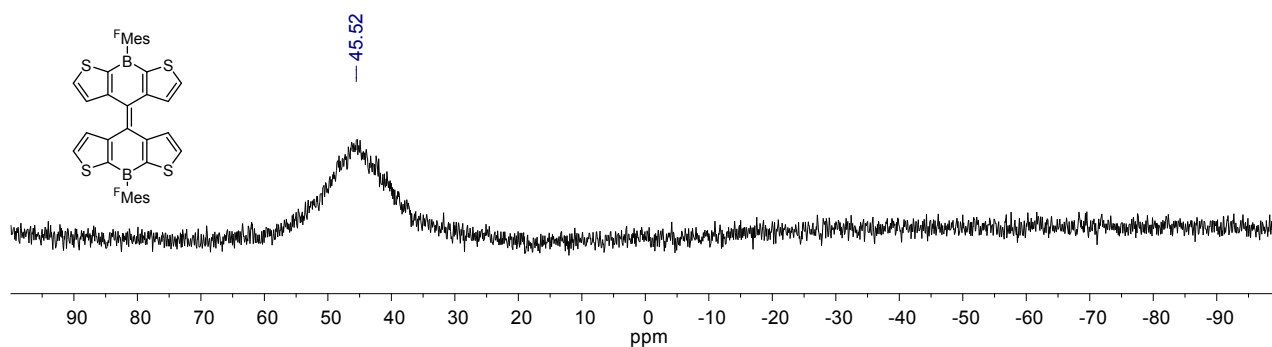

**Figure S42.**  $^{11}\text{B}$  NMR spectrum of dDTCB in  $\text{CDCl}_3$  at room temperature (160 MHz).

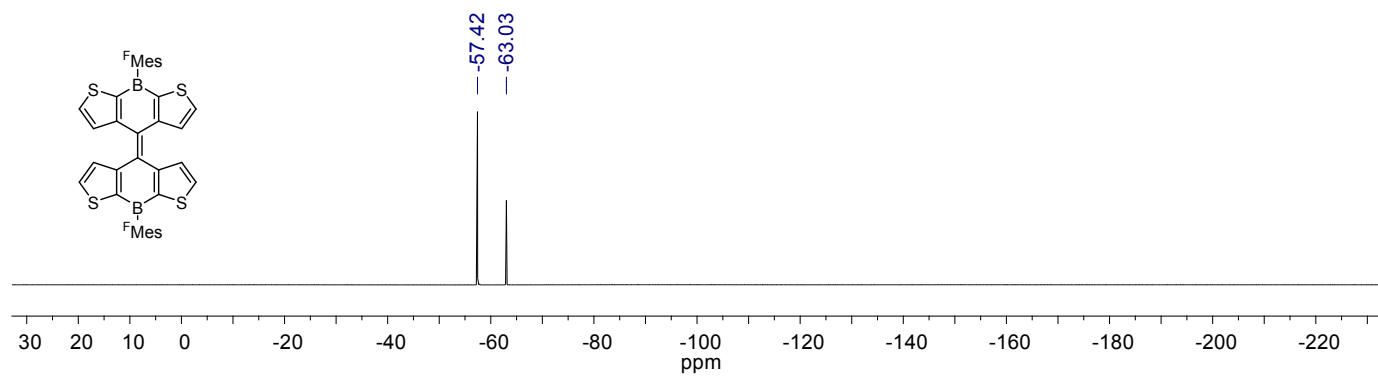

**Figure S43.**  $^{19}\text{F}$  NMR spectrum of dDTCB in  $\text{CDCl}_3$  at room temperature (470 MHz).

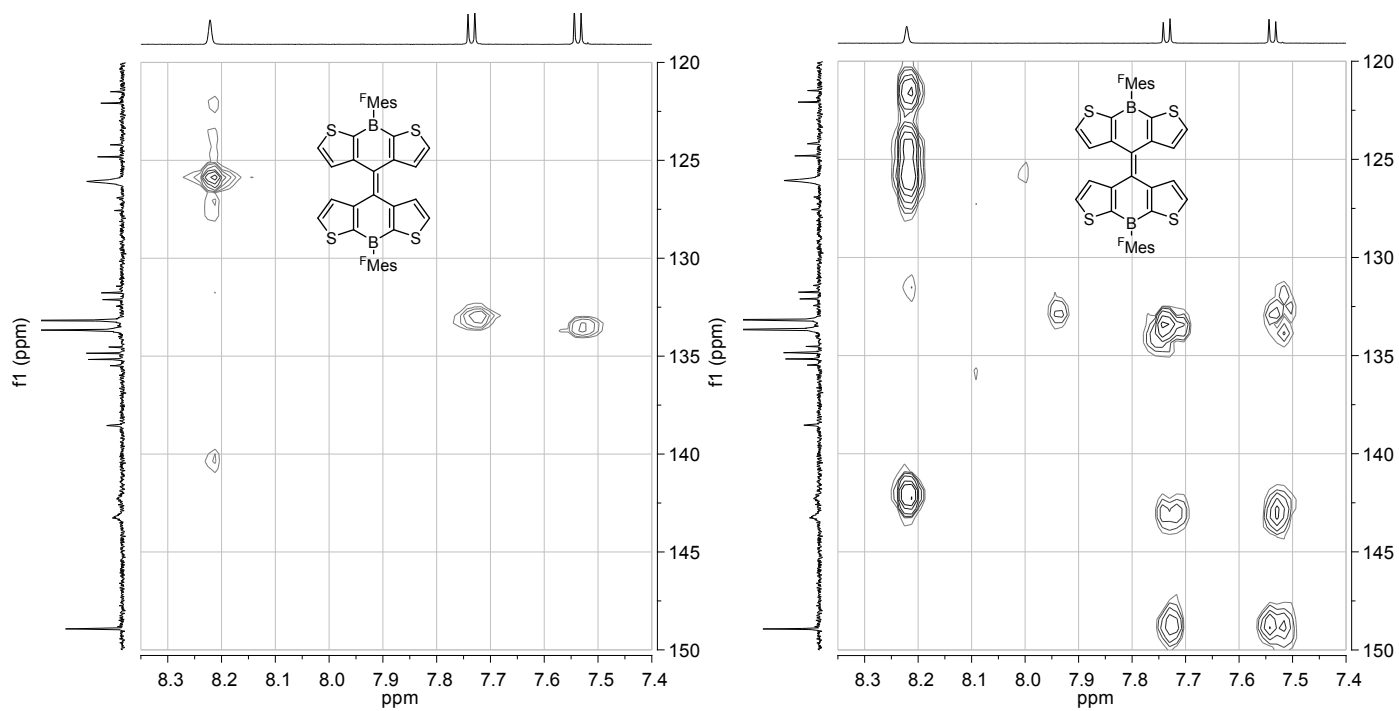

**Figure S44.** HMQC (left) and HMBC (right) NMR spectra of dDTCB in  $\text{CDCl}_3$  at room temperature.

200930\_infusion\_10 #8 RT: 0.11 AV: 1 NL: 8.98E7  
T: FTMS + p APCI corona Full ms [150.00-2000.00]

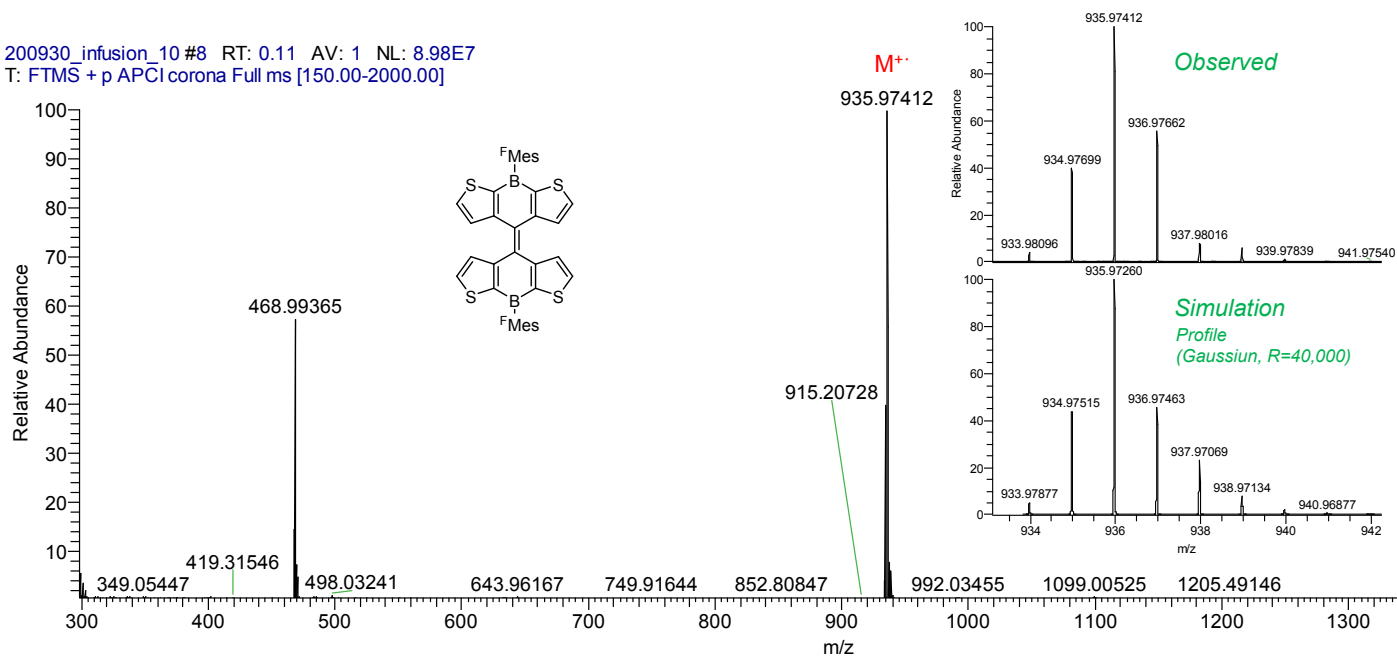

Figure S45. APCI mass spectrum of dDTCB (positive mode).

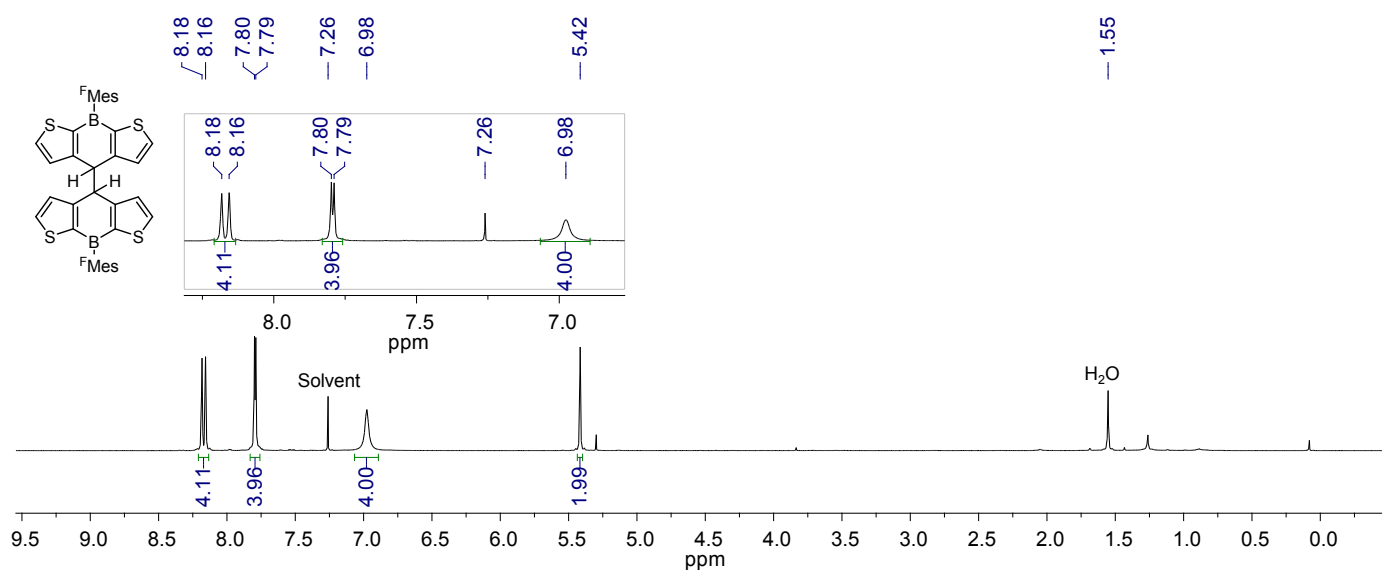

Figure S46. <sup>1</sup>H NMR spectrum of **3** in CDCl<sub>3</sub> at room temperature (500 MHz).

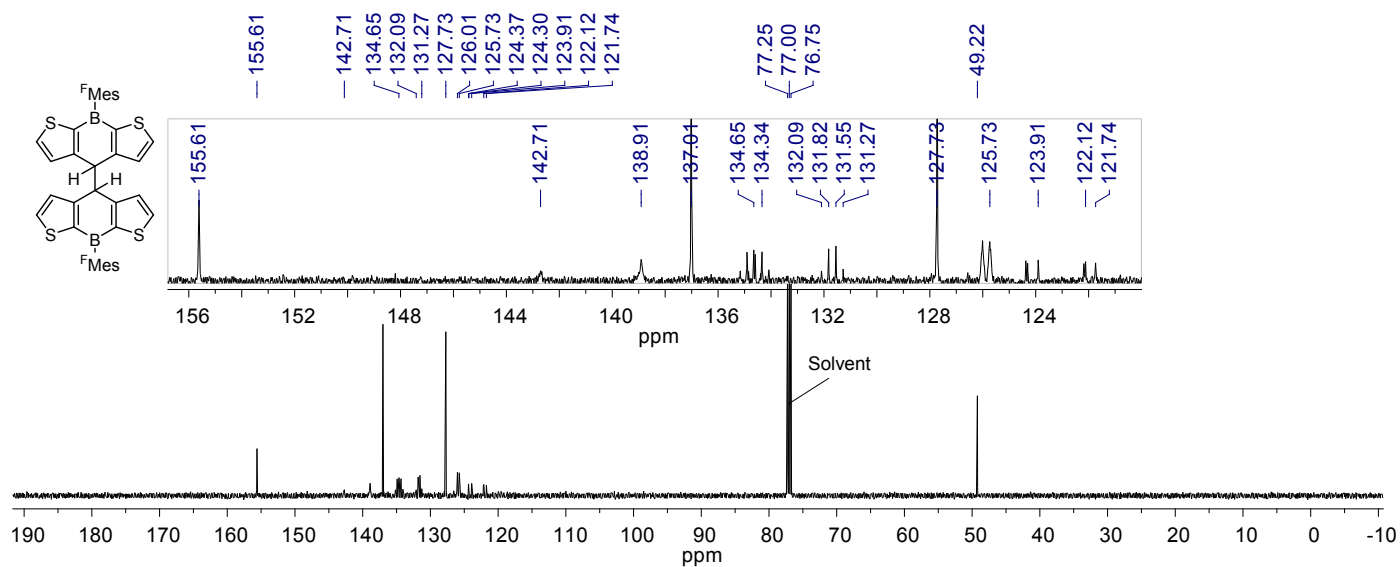

**Figure S47.**  $^{13}\text{C}$  NMR spectrum of **3** in  $\text{CDCl}_3$  at room temperature (125 MHz).

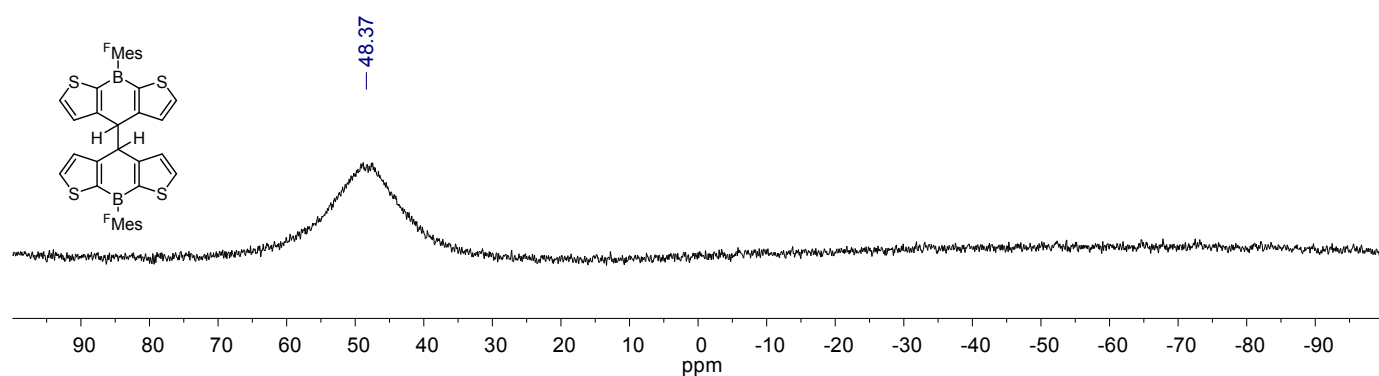

**Figure S48.**  $^{11}\text{B}$  NMR spectrum of **3** in  $\text{CDCl}_3$  at room temperature (160 MHz).

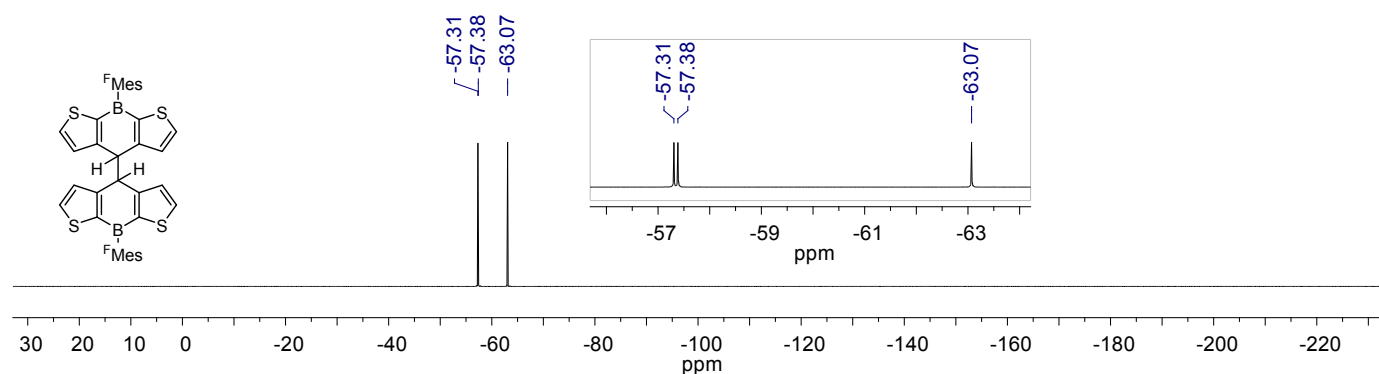

**Figure S49.**  $^{19}\text{F}$  NMR spectrum of **3** in  $\text{CDCl}_3$  at room temperature (470 MHz).



200930\_infusion\_12 #214 RT: 3.74 AV: 1 NL: 9.84E5  
T: FTMS + p ESI Full ms [150.00-2000.00]

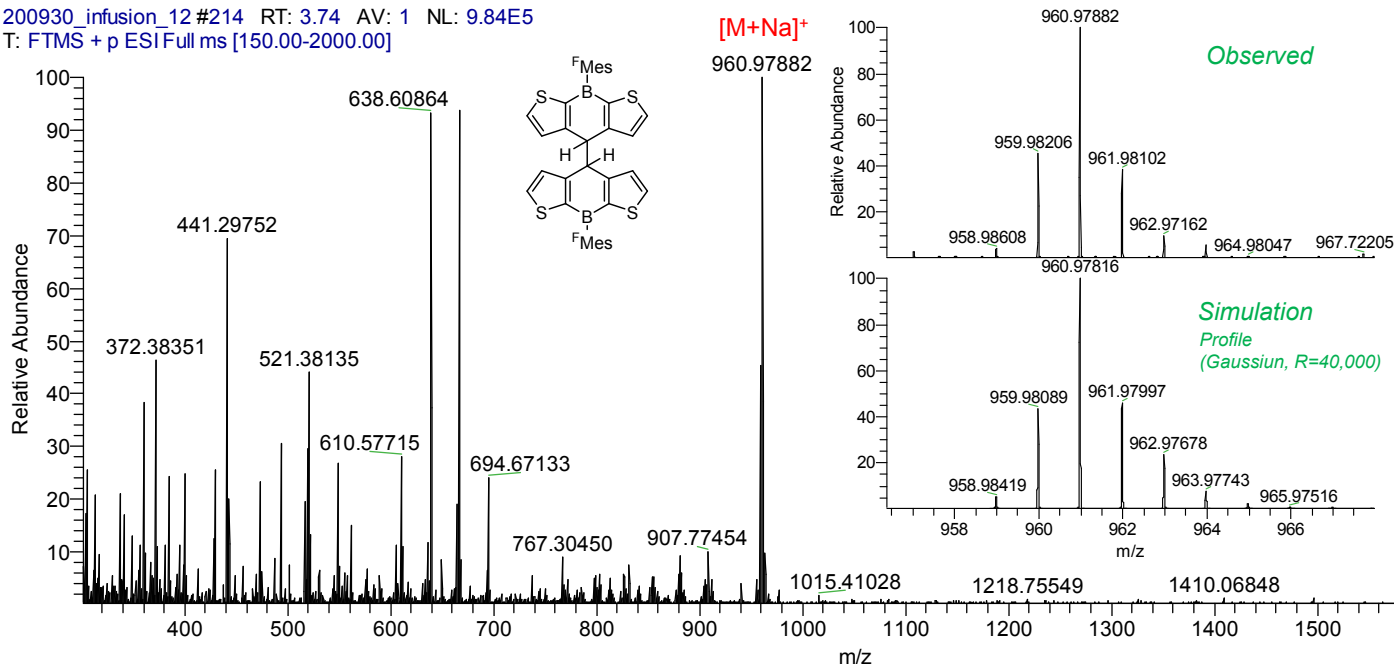

**Figure S50.** ESI mass spectrum of **3** (positive mode).

## Cartesian Coordinates for Optimized Structures

**Table S5.** Coordinates for optimized structure of the twisted conformer of **ddTCB** in the ground state ( $S_0$ ).

Total Energy: -4819.78083319 Hartree

# opt b3lyp/6-311+g(d,p)

| Center<br>Number | Atomic<br>Number | Atomic<br>Type | Coordinates (Angstroms) |           |           |
|------------------|------------------|----------------|-------------------------|-----------|-----------|
|                  |                  |                | X                       | Y         | Z         |
| 1                | 6                | 0              | 1.129691                | 1.466768  | -0.520626 |
| 2                | 6                | 0              | 1.135815                | 2.869498  | -0.530504 |
| 3                | 6                | 0              | -0.002550               | 0.708502  | 0.002170  |
| 4                | 6                | 0              | -1.140356               | 1.458591  | 0.524788  |
| 5                | 6                | 0              | -1.156077               | 2.861313  | 0.535870  |
| 6                | 6                | 0              | -2.248787               | 0.906554  | 1.253360  |
| 7                | 6                | 0              | -3.096348               | 1.854896  | 1.740182  |
| 8                | 16               | 0              | -2.559058               | 3.456610  | 1.372113  |
| 9                | 5                | 0              | -0.012906               | 3.715553  | 0.003268  |
| 10               | 16               | 0              | 2.533321                | 3.475248  | -1.368334 |
| 11               | 6                | 0              | 3.081146                | 1.877536  | -1.738505 |
| 12               | 6                | 0              | 2.240985                | 0.922952  | -1.251054 |
| 13               | 6                | 0              | 2.248787                | -0.906554 | 1.253360  |
| 14               | 6                | 0              | 3.096348                | -1.854896 | 1.740182  |
| 15               | 16               | 0              | 2.559058                | -3.456610 | 1.372113  |
| 16               | 5                | 0              | 0.012906                | -3.715553 | 0.003268  |
| 17               | 16               | 0              | -2.533321               | -3.475248 | -1.368334 |
| 18               | 6                | 0              | -3.081146               | -1.877536 | -1.738505 |
| 19               | 6                | 0              | -2.240985               | -0.922952 | -1.251054 |
| 20               | 6                | 0              | -1.135815               | -2.869498 | -0.530504 |
| 21               | 6                | 0              | -1.129691               | -1.466768 | -0.520626 |
| 22               | 6                | 0              | 0.002550                | -0.708502 | 0.002170  |
| 23               | 6                | 0              | 1.156077                | -2.861313 | 0.535870  |
| 24               | 6                | 0              | 1.140356                | -1.458591 | 0.524788  |
| 25               | 6                | 0              | -0.017178               | 5.312310  | 0.003848  |
| 26               | 6                | 0              | 0.406187                | 6.065064  | 1.120388  |
| 27               | 6                | 0              | 0.404179                | 7.458936  | 1.125130  |
| 28               | 6                | 0              | -0.027025               | 8.157203  | 0.005600  |
| 29               | 6                | 0              | -0.451593               | 7.457306  | -1.115312 |
| 30               | 6                | 0              | -0.445795               | 6.063403  | -1.111581 |
| 31               | 6                | 0              | -0.882655               | 5.411873  | -2.407593 |
| 32               | 9                | 0              | 0.112114                | 5.429349  | -3.327401 |
| 33               | 9                | 0              | -1.929560               | 6.065377  | -2.961587 |
| 34               | 9                | 0              | -1.257052               | 4.126336  | -2.258033 |
| 35               | 6                | 0              | 0.840595                | 5.413640  | 2.417294  |
| 36               | 9                | 0              | -0.162680               | 5.409784  | 3.327869  |
| 37               | 9                | 0              | 1.871954                | 6.080047  | 2.984909  |
| 38               | 9                | 0              | 1.236751                | 4.135026  | 2.263623  |
| 39               | 6                | 0              | 0.017178                | 9.663452  | -0.012968 |
| 40               | 9                | 0              | -0.153409               | 10.188565 | 1.218463  |
| 41               | 9                | 0              | -0.935992               | 10.185817 | -0.812767 |
| 42               | 9                | 0              | 1.207975                | 10.118811 | -0.472378 |
| 43               | 6                | 0              | 0.017178                | -5.312310 | 0.003848  |
| 44               | 6                | 0              | -0.406187               | -6.065064 | 1.120388  |
| 45               | 6                | 0              | -0.404179               | -7.458936 | 1.125130  |
| 46               | 6                | 0              | 0.027025                | -8.157203 | 0.005600  |
| 47               | 6                | 0              | 0.451593                | -7.457306 | -1.115312 |
| 48               | 6                | 0              | 0.445795                | -6.063403 | -1.111581 |

|    |   |   |           |            |           |
|----|---|---|-----------|------------|-----------|
| 49 | 6 | 0 | 0.882655  | -5.411873  | -2.407593 |
| 50 | 9 | 0 | 1.929560  | -6.065377  | -2.961587 |
| 51 | 9 | 0 | 1.257052  | -4.126336  | -2.258033 |
| 52 | 9 | 0 | -0.112114 | -5.429349  | -3.327401 |
| 53 | 6 | 0 | -0.840595 | -5.413640  | 2.417294  |
| 54 | 9 | 0 | -1.871954 | -6.080047  | 2.984909  |
| 55 | 9 | 0 | -1.236751 | -4.135026  | 2.263623  |
| 56 | 9 | 0 | 0.162680  | -5.409784  | 3.327869  |
| 57 | 6 | 0 | -0.017178 | -9.663452  | -0.012968 |
| 58 | 9 | 0 | 0.153409  | -10.188565 | 1.218463  |
| 59 | 9 | 0 | 0.935992  | -10.185817 | -0.812767 |
| 60 | 9 | 0 | -1.207975 | -10.118811 | -0.472378 |
| 61 | 1 | 0 | -2.402348 | -0.149402  | 1.418995  |
| 62 | 1 | 0 | -3.999727 | 1.702001   | 2.311343  |
| 63 | 1 | 0 | 3.984682  | 1.731379   | -2.311179 |
| 64 | 1 | 0 | 2.401604  | -0.131814  | -1.417649 |
| 65 | 1 | 0 | 2.402348  | 0.149402   | 1.418995  |
| 66 | 1 | 0 | 3.999727  | -1.702001  | 2.311343  |
| 67 | 1 | 0 | -3.984682 | -1.731379  | -2.311179 |
| 68 | 1 | 0 | -2.401604 | 0.131814   | -1.417649 |
| 69 | 1 | 0 | 0.735732  | 7.996055   | 2.004152  |
| 70 | 1 | 0 | -0.797409 | 7.993146   | -1.989662 |
| 71 | 1 | 0 | -0.735732 | -7.996055  | 2.004152  |
| 72 | 1 | 0 | 0.797409  | -7.993146  | -1.989662 |

**Table S6.** Coordinates for optimized structure of the folded conformer of **dDTCB** in the ground state ( $S_0$ ).

Total Energy: -4819.76998237 Hartree

# opt b3lyp/6-311+g(d,p)

| Center<br>Number | Atomic<br>Number | Atomic<br>Type | Coordinates (Angstroms) |           |           |
|------------------|------------------|----------------|-------------------------|-----------|-----------|
|                  |                  |                | X                       | Y         | Z         |
| 1                | 6                | 0              | -0.678144               | 1.351491  | 1.260986  |
| 2                | 6                | 0              | -0.555769               | 2.740955  | 1.287847  |
| 3                | 6                | 0              | -0.326941               | 0.605332  | 0.025134  |
| 4                | 6                | 0              | -0.667294               | 1.349064  | -1.215152 |
| 5                | 6                | 0              | -0.526291               | 2.736589  | -1.244219 |
| 6                | 6                | 0              | -1.201822               | 0.827880  | -2.429418 |
| 7                | 6                | 0              | -1.418633               | 1.796302  | -3.371572 |
| 8                | 16               | 0              | -0.972586               | 3.362796  | -2.807901 |
| 9                | 5                | 0              | -0.340250               | 3.575942  | 0.021716  |
| 10               | 16               | 0              | -0.989454               | 3.361223  | 2.856540  |
| 11               | 6                | 0              | -1.417349               | 1.790127  | 3.424155  |
| 12               | 6                | 0              | -1.199655               | 0.825258  | 2.479691  |
| 13               | 6                | 0              | 1.199655                | -0.825258 | 2.479691  |
| 14               | 6                | 0              | 1.417349                | -1.790127 | 3.424155  |
| 15               | 16               | 0              | 0.989454                | -3.361223 | 2.856540  |
| 16               | 5                | 0              | 0.340250                | -3.575942 | 0.021716  |
| 17               | 16               | 0              | 0.972586                | -3.362796 | -2.807901 |
| 18               | 6                | 0              | 1.418633                | -1.796302 | -3.371572 |
| 19               | 6                | 0              | 1.201822                | -0.827880 | -2.429418 |
| 20               | 6                | 0              | 0.526291                | -2.736589 | -1.244219 |
| 21               | 6                | 0              | 0.667294                | -1.349064 | -1.215152 |
| 22               | 6                | 0              | 0.326941                | -0.605332 | 0.025134  |
| 23               | 6                | 0              | 0.555769                | -2.740955 | 1.287847  |
| 24               | 6                | 0              | 0.678144                | -1.351491 | 1.260986  |
| 25               | 6                | 0              | -0.069324               | 5.147853  | 0.005910  |
| 26               | 6                | 0              | -1.084469               | 6.117268  | 0.107318  |

|    |   |   |           |            |           |
|----|---|---|-----------|------------|-----------|
| 27 | 6 | 0 | -0.810985 | 7.487027   | 0.105837  |
| 28 | 6 | 0 | 0.495535  | 7.934399   | -0.003935 |
| 29 | 6 | 0 | 1.529303  | 7.010989   | -0.122848 |
| 30 | 6 | 0 | 1.247514  | 5.649309   | -0.120967 |
| 31 | 6 | 0 | 2.420526  | 4.716317   | -0.336838 |
| 32 | 9 | 0 | 2.273277  | 3.538432   | 0.307850  |
| 33 | 9 | 0 | 3.582063  | 5.255602   | 0.090824  |
| 34 | 9 | 0 | 2.587127  | 4.425832   | -1.649677 |
| 35 | 6 | 0 | -2.551471 | 5.763385   | 0.236397  |
| 36 | 9 | 0 | -3.301812 | 6.471465   | -0.640578 |
| 37 | 9 | 0 | -3.023777 | 6.060199   | 1.470921  |
| 38 | 9 | 0 | -2.809406 | 4.461889   | 0.014493  |
| 39 | 6 | 0 | 0.810985  | 9.407150   | 0.046361  |
| 40 | 9 | 0 | -0.252169 | 10.166005  | -0.288233 |
| 41 | 9 | 0 | 1.820953  | 9.732082   | -0.789609 |
| 42 | 9 | 0 | 1.194567  | 9.789292   | 1.288430  |
| 43 | 6 | 0 | 0.069324  | -5.147853  | 0.005910  |
| 44 | 6 | 0 | -1.247514 | -5.649309  | -0.120967 |
| 45 | 6 | 0 | -1.529303 | -7.010989  | -0.122848 |
| 46 | 6 | 0 | -0.495535 | -7.934399  | -0.003935 |
| 47 | 6 | 0 | 0.810985  | -7.487027  | 0.105837  |
| 48 | 6 | 0 | 1.084469  | -6.117268  | 0.107318  |
| 49 | 6 | 0 | 2.551471  | -5.763385  | 0.236397  |
| 50 | 9 | 0 | 3.023777  | -6.060199  | 1.470921  |
| 51 | 9 | 0 | 2.809406  | -4.461889  | 0.014493  |
| 52 | 9 | 0 | 3.301812  | -6.471465  | -0.640578 |
| 53 | 6 | 0 | -2.420526 | -4.716317  | -0.336838 |
| 54 | 9 | 0 | -3.582063 | -5.255602  | 0.090824  |
| 55 | 9 | 0 | -2.587127 | -4.425832  | -1.649677 |
| 56 | 9 | 0 | -2.273277 | -3.538432  | 0.307850  |
| 57 | 6 | 0 | -0.810985 | -9.407150  | 0.046361  |
| 58 | 9 | 0 | -1.194567 | -9.789292  | 1.288430  |
| 59 | 9 | 0 | 0.252169  | -10.166005 | -0.288233 |
| 60 | 9 | 0 | -1.820953 | -9.732082  | -0.789609 |
| 61 | 1 | 0 | -1.442295 | -0.212036  | -2.592308 |
| 62 | 1 | 0 | -1.829761 | 1.671340   | -4.362140 |
| 63 | 1 | 0 | -1.820544 | 1.662215   | 4.417540  |
| 64 | 1 | 0 | -1.429222 | -0.216906  | 2.643417  |
| 65 | 1 | 0 | 1.429222  | 0.216906   | 2.643417  |
| 66 | 1 | 0 | 1.820544  | -1.662215  | 4.417540  |
| 67 | 1 | 0 | 1.829761  | -1.671340  | -4.362140 |
| 68 | 1 | 0 | 1.442295  | 0.212036   | -2.592308 |
| 69 | 1 | 0 | -1.622814 | 8.198970   | 0.180349  |
| 70 | 1 | 0 | 2.551710  | 7.350843   | -0.221581 |
| 71 | 1 | 0 | -2.551710 | -7.350843  | -0.221581 |
| 72 | 1 | 0 | 1.622814  | -8.198970  | 0.180349  |

**Table S7.** Coordinates for optimized structure of **ddTCB** in the triplet state ( $T_1$ ).

Total Energy: -4819.77377296 Hartree

# opt ub3lyp/6-311+g(d,p)

| Center Number | Atomic Number | Atomic Type | Coordinates (Angstroms) |          |           |
|---------------|---------------|-------------|-------------------------|----------|-----------|
|               |               |             | X                       | Y        | Z         |
| 1             | 6             | 0           | -0.678144               | 1.351491 | 1.260986  |
| 2             | 6             | 0           | -0.555769               | 2.740955 | 1.287847  |
| 3             | 6             | 0           | -0.326941               | 0.605332 | 0.025134  |
| 4             | 6             | 0           | -0.667294               | 1.349064 | -1.215152 |

|    |    |   |           |            |           |
|----|----|---|-----------|------------|-----------|
| 5  | 6  | 0 | -0.526291 | 2.736589   | -1.244219 |
| 6  | 6  | 0 | -1.201822 | 0.827880   | -2.429418 |
| 7  | 6  | 0 | -1.418633 | 1.796302   | -3.371572 |
| 8  | 16 | 0 | -0.972586 | 3.362796   | -2.807901 |
| 9  | 5  | 0 | -0.340250 | 3.575942   | 0.021716  |
| 10 | 16 | 0 | -0.989454 | 3.361223   | 2.856540  |
| 11 | 6  | 0 | -1.417349 | 1.790127   | 3.424155  |
| 12 | 6  | 0 | -1.199655 | 0.825258   | 2.479691  |
| 13 | 6  | 0 | 1.199655  | -0.825258  | 2.479691  |
| 14 | 6  | 0 | 1.417349  | -1.790127  | 3.424155  |
| 15 | 16 | 0 | 0.989454  | -3.361223  | 2.856540  |
| 16 | 5  | 0 | 0.340250  | -3.575942  | 0.021716  |
| 17 | 16 | 0 | 0.972586  | -3.362796  | -2.807901 |
| 18 | 6  | 0 | 1.418633  | -1.796302  | -3.371572 |
| 19 | 6  | 0 | 1.201822  | -0.827880  | -2.429418 |
| 20 | 6  | 0 | 0.526291  | -2.736589  | -1.244219 |
| 21 | 6  | 0 | 0.667294  | -1.349064  | -1.215152 |
| 22 | 6  | 0 | 0.326941  | -0.605332  | 0.025134  |
| 23 | 6  | 0 | 0.555769  | -2.740955  | 1.287847  |
| 24 | 6  | 0 | 0.678144  | -1.351491  | 1.260986  |
| 25 | 6  | 0 | -0.069324 | 5.147853   | 0.005910  |
| 26 | 6  | 0 | -1.084469 | 6.117268   | 0.107318  |
| 27 | 6  | 0 | -0.810985 | 7.487027   | 0.105837  |
| 28 | 6  | 0 | 0.495535  | 7.934399   | -0.003935 |
| 29 | 6  | 0 | 1.529303  | 7.010989   | -0.122848 |
| 30 | 6  | 0 | 1.247514  | 5.649309   | -0.120967 |
| 31 | 6  | 0 | 2.420526  | 4.716317   | -0.336838 |
| 32 | 9  | 0 | 2.273277  | 3.538432   | 0.307850  |
| 33 | 9  | 0 | 3.582063  | 5.255602   | 0.090824  |
| 34 | 9  | 0 | 2.587127  | 4.425832   | -1.649677 |
| 35 | 6  | 0 | -2.551471 | 5.763385   | 0.236397  |
| 36 | 9  | 0 | -3.301812 | 6.471465   | -0.640578 |
| 37 | 9  | 0 | -3.023777 | 6.060199   | 1.470921  |
| 38 | 9  | 0 | -2.809406 | 4.461889   | 0.014493  |
| 39 | 6  | 0 | 0.810985  | 9.407150   | 0.046361  |
| 40 | 9  | 0 | -0.252169 | 10.166005  | -0.288233 |
| 41 | 9  | 0 | 1.820953  | 9.732082   | -0.789609 |
| 42 | 9  | 0 | 1.194567  | 9.789292   | 1.288430  |
| 43 | 6  | 0 | 0.069324  | -5.147853  | 0.005910  |
| 44 | 6  | 0 | -1.247514 | -5.649309  | -0.120967 |
| 45 | 6  | 0 | -1.529303 | -7.010989  | -0.122848 |
| 46 | 6  | 0 | -0.495535 | -7.934399  | -0.003935 |
| 47 | 6  | 0 | 0.810985  | -7.487027  | 0.105837  |
| 48 | 6  | 0 | 1.084469  | -6.117268  | 0.107318  |
| 49 | 6  | 0 | 2.551471  | -5.763385  | 0.236397  |
| 50 | 9  | 0 | 3.023777  | -6.060199  | 1.470921  |
| 51 | 9  | 0 | 2.809406  | -4.461889  | 0.014493  |
| 52 | 9  | 0 | 3.301812  | -6.471465  | -0.640578 |
| 53 | 6  | 0 | -2.420526 | -4.716317  | -0.336838 |
| 54 | 9  | 0 | -3.582063 | -5.255602  | 0.090824  |
| 55 | 9  | 0 | -2.587127 | -4.425832  | -1.649677 |
| 56 | 9  | 0 | -2.273277 | -3.538432  | 0.307850  |
| 57 | 6  | 0 | -0.810985 | -9.407150  | 0.046361  |
| 58 | 9  | 0 | -1.194567 | -9.789292  | 1.288430  |
| 59 | 9  | 0 | 0.252169  | -10.166005 | -0.288233 |
| 60 | 9  | 0 | -1.820953 | -9.732082  | -0.789609 |
| 61 | 1  | 0 | -1.442295 | -0.212036  | -2.592308 |
| 62 | 1  | 0 | -1.829761 | 1.671340   | -4.362140 |
| 63 | 1  | 0 | -1.820544 | 1.662215   | 4.417540  |
| 64 | 1  | 0 | -1.429222 | -0.216906  | 2.643417  |
| 65 | 1  | 0 | 1.429222  | 0.216906   | 2.643417  |

|    |   |   |           |           |           |
|----|---|---|-----------|-----------|-----------|
| 66 | 1 | 0 | 1.820544  | -1.662215 | 4.417540  |
| 67 | 1 | 0 | 1.829761  | -1.671340 | -4.362140 |
| 68 | 1 | 0 | 1.442295  | 0.212036  | -2.592308 |
| 69 | 1 | 0 | -1.622814 | 8.198970  | 0.180349  |
| 70 | 1 | 0 | 2.551710  | 7.350843  | -0.221581 |
| 71 | 1 | 0 | -2.551710 | -7.350843 | -0.221581 |
| 72 | 1 | 0 | 1.622814  | -8.198970 | 0.180349  |

**Table S8.** Coordinates for optimized structure of **ddTCB** in the transition state (TS).

Total Energy: -4819.75453097 Hartree

# opt=(readfc,ts) b3lyp/6-311+g(d,p) scf=(vshift=700,maxcycle=100) geom=allcheck guess=read

| Center Number | Atomic Number | Atomic Type | Coordinates (Angstroms) |           |           |
|---------------|---------------|-------------|-------------------------|-----------|-----------|
|               |               |             | X                       | Y         | Z         |
| 1             | 6             | 0           | -1.725342               | 2.186102  | 0.145389  |
| 2             | 6             | 0           | -3.064988               | 1.758012  | 0.033233  |
| 3             | 6             | 0           | -0.666856               | 1.148362  | 0.239631  |
| 4             | 6             | 0           | -1.137646               | -0.146422 | 0.795334  |
| 5             | 6             | 0           | -2.465487               | -0.568117 | 0.760846  |
| 6             | 6             | 0           | -0.306657               | -1.049894 | 1.533598  |
| 7             | 6             | 0           | -0.984310               | -2.137809 | 2.002881  |
| 8             | 16            | 0           | -2.653511               | -2.098385 | 1.566402  |
| 9             | 5             | 0           | -3.572306               | 0.338239  | 0.262922  |
| 10            | 16            | 0           | -4.133788               | 3.085032  | -0.302546 |
| 11            | 6             | 0           | -2.848899               | 4.217762  | -0.220749 |
| 12            | 6             | 0           | -1.648829               | 3.608907  | 0.013376  |
| 13            | 6             | 0           | 1.632980                | 3.617541  | 0.008633  |
| 14            | 6             | 0           | 2.829565                | 4.232121  | 0.245528  |
| 15            | 16            | 0           | 4.120978                | 3.106409  | 0.321087  |
| 16            | 5             | 0           | 3.574789                | 0.358902  | -0.256812 |
| 17            | 16            | 0           | 2.669039                | -2.077544 | -1.569390 |
| 18            | 6             | 0           | 0.999991                | -2.124477 | -2.005599 |
| 19            | 6             | 0           | 0.316401                | -1.042172 | -1.531931 |
| 20            | 6             | 0           | 2.472712                | -0.551517 | -0.757786 |
| 21            | 6             | 0           | 1.142529                | -0.137041 | -0.790271 |
| 22            | 6             | 0           | 0.664835                | 1.152868  | -0.229222 |
| 23            | 6             | 0           | 3.059807                | 1.774923  | -0.021176 |
| 24            | 6             | 0           | 1.717650                | 2.195905  | -0.130628 |
| 25            | 6             | 0           | -5.087400               | -0.120234 | 0.061464  |
| 26            | 6             | 0           | -6.088027               | 0.069312  | 1.033879  |
| 27            | 6             | 0           | -7.409100               | -0.336169 | 0.834443  |
| 28            | 6             | 0           | -7.774289               | -0.953183 | -0.351502 |
| 29            | 6             | 0           | -6.815677               | -1.171881 | -1.335060 |
| 30            | 6             | 0           | -5.501536               | -0.765477 | -1.127180 |
| 31            | 6             | 0           | -4.509427               | -1.111550 | -2.217870 |
| 32            | 9             | 0           | -3.528326               | -0.190914 | -2.344425 |
| 33            | 9             | 0           | -5.102517               | -1.219615 | -3.425828 |
| 34            | 9             | 0           | -3.900530               | -2.298646 | -1.977704 |
| 35            | 6             | 0           | -5.819909               | 0.750395  | 2.360215  |
| 36            | 9             | 0           | -6.418958               | 0.090694  | 3.378979  |
| 37            | 9             | 0           | -6.315386               | 2.011669  | 2.376649  |
| 38            | 9             | 0           | -4.511278               | 0.835076  | 2.661188  |
| 39            | 6             | 0           | -9.207159               | -1.347310 | -0.601563 |
| 40            | 9             | 0           | -9.891446               | -1.527801 | 0.546319  |
| 41            | 9             | 0           | -9.296013               | -2.492625 | -1.311720 |
| 42            | 9             | 0           | -9.865812               | -0.397445 | -1.308880 |
| 43            | 6             | 0           | 5.091940                | -0.093963 | -0.057964 |

|    |   |   |           |           |           |
|----|---|---|-----------|-----------|-----------|
| 44 | 6 | 0 | 5.509056  | -0.742401 | 1.128287  |
| 45 | 6 | 0 | 6.824897  | -1.142812 | 1.334423  |
| 46 | 6 | 0 | 7.783407  | -0.912804 | 0.352781  |
| 47 | 6 | 0 | 7.415108  | -0.294888 | -0.831235 |
| 48 | 6 | 0 | 6.091862  | 0.105875  | -1.028622 |
| 49 | 6 | 0 | 5.821066  | 0.797118  | -2.349099 |
| 50 | 9 | 0 | 6.300829  | 2.064513  | -2.351367 |
| 51 | 9 | 0 | 4.512545  | 0.868409  | -2.654299 |
| 52 | 9 | 0 | 6.431957  | 0.154979  | -3.372098 |
| 53 | 6 | 0 | 4.519307  | -1.094038 | 2.219436  |
| 54 | 9 | 0 | 5.114346  | -1.204289 | 3.426180  |
| 55 | 9 | 0 | 3.913504  | -2.282074 | 1.976122  |
| 56 | 9 | 0 | 3.535653  | -0.176738 | 2.350293  |
| 57 | 6 | 0 | 9.197659  | -1.385872 | 0.569906  |
| 58 | 9 | 0 | 9.612450  | -1.155189 | 1.834904  |
| 59 | 9 | 0 | 10.070496 | -0.779473 | -0.259454 |
| 60 | 9 | 0 | 9.312215  | -2.719525 | 0.359941  |
| 61 | 1 | 0 | 0.743069  | -0.886978 | 1.728471  |
| 62 | 1 | 0 | -0.594379 | -2.953467 | 2.593047  |
| 63 | 1 | 0 | -3.035455 | 5.275999  | -0.324636 |
| 64 | 1 | 0 | -0.771603 | 4.202446  | 0.160283  |
| 65 | 1 | 0 | 0.752229  | 4.206645  | -0.134905 |
| 66 | 1 | 0 | 3.010057  | 5.290878  | 0.354691  |
| 67 | 1 | 0 | 0.614438  | -2.939949 | -2.598893 |
| 68 | 1 | 0 | -0.734249 | -0.884333 | -1.725990 |
| 69 | 1 | 0 | -8.145182 | -0.177681 | 1.611777  |
| 70 | 1 | 0 | -7.090061 | -1.661847 | -2.259688 |
| 71 | 1 | 0 | 7.103689  | -1.625130 | 2.261941  |
| 72 | 1 | 0 | 8.152571  | -0.120549 | -1.603665 |

**Table S9.** Coordinates for optimized structure of the folded conformer of **m1** in the ground state ( $S_0$ ).

Total Energy: -2362.34629980 Hartree

# opt b3lyp/6-311+g(d,p)

| Center<br>Number | Atomic<br>Number | Atomic<br>Type | Coordinates (Angstroms) |           |           |
|------------------|------------------|----------------|-------------------------|-----------|-----------|
|                  |                  |                | X                       | Y         | Z         |
| 1                | 6                | 0              | 1.232525                | -2.454547 | 0.869543  |
| 2                | 6                | 0              | 2.265763                | -3.339412 | 0.828696  |
| 3                | 16               | 0              | 3.630064                | -2.697110 | -0.036416 |
| 4                | 16               | 0              | 3.630279                | 2.697064  | -0.036018 |
| 5                | 6                | 0              | 2.266089                | 3.339291  | 0.829321  |
| 6                | 6                | 0              | 1.232774                | 2.454508  | 0.870030  |
| 7                | 6                | 0              | 2.790745                | 1.207954  | -0.332000 |
| 8                | 6                | 0              | 1.515814                | 1.223259  | 0.185761  |
| 9                | 6                | 0              | 0.676994                | 0.000080  | 0.089815  |
| 10               | 6                | 0              | 2.790658                | -1.207882 | -0.332172 |
| 11               | 6                | 0              | 1.515727                | -1.223164 | 0.185585  |
| 12               | 6                | 0              | -1.515727               | -1.223164 | -0.185586 |
| 13               | 6                | 0              | -2.790658               | -1.207882 | 0.332172  |
| 14               | 6                | 0              | -0.676994               | 0.000080  | -0.089815 |
| 15               | 6                | 0              | -1.515814               | 1.223259  | -0.185761 |
| 16               | 6                | 0              | -2.790745               | 1.207954  | 0.332000  |
| 17               | 6                | 0              | -1.232775               | 2.454508  | -0.870030 |
| 18               | 6                | 0              | -2.266090               | 3.339291  | -0.829322 |
| 19               | 16               | 0              | -3.630279               | 2.697065  | 0.036018  |
| 20               | 16               | 0              | -3.630064               | -2.697110 | 0.036416  |
| 21               | 6                | 0              | -2.265763               | -3.339412 | -0.828696 |

|    |   |   |           |           |           |
|----|---|---|-----------|-----------|-----------|
| 22 | 6 | 0 | -1.232525 | -2.454547 | -0.869544 |
| 23 | 6 | 0 | 3.413670  | 0.000059  | -0.978061 |
| 24 | 6 | 0 | -3.413670 | 0.000059  | 0.978061  |
| 25 | 1 | 0 | 0.304239  | -2.659445 | 1.381785  |
| 26 | 1 | 0 | 2.319742  | -4.326942 | 1.260231  |
| 27 | 1 | 0 | 2.320186  | 4.326713  | 1.261088  |
| 28 | 1 | 0 | 0.304551  | 2.659368  | 1.382395  |
| 29 | 1 | 0 | -0.304551 | 2.659368  | -1.382397 |
| 30 | 1 | 0 | -2.320187 | 4.326713  | -1.261089 |
| 31 | 1 | 0 | -2.319742 | -4.326942 | -1.260231 |
| 32 | 1 | 0 | -0.304239 | -2.659444 | -1.381786 |
| 33 | 1 | 0 | 4.499094  | 0.000010  | -0.850108 |
| 34 | 1 | 0 | 3.227904  | 0.000145  | -2.061597 |
| 35 | 1 | 0 | -3.227904 | 0.000145  | 2.061597  |
| 36 | 1 | 0 | -4.499094 | 0.000010  | 0.850108  |

**Table S10.** Coordinates for optimized structure of the twisted conformer of **m1** in the ground state ( $S_0$ ).

Total Energy: -2362.34205647 Hartree

# opt b3lyp/6-311+g(d,p)

| Center<br>Number | Atomic<br>Number | Atomic<br>Type | Coordinates (Angstroms) |           |           |
|------------------|------------------|----------------|-------------------------|-----------|-----------|
|                  |                  |                | X                       | Y         | Z         |
| 1                | 6                | 0              | -0.988351               | -2.310239 | 1.158493  |
| 2                | 6                | 0              | -1.963018               | -3.131358 | 1.621841  |
| 3                | 16               | 0              | -3.549781               | -2.514351 | 1.266141  |
| 4                | 16               | 0              | -3.549628               | 2.514451  | -1.266214 |
| 5                | 6                | 0              | -1.962825               | 3.131558  | -1.621558 |
| 6                | 6                | 0              | -0.988209               | 2.310389  | -1.158191 |
| 7                | 6                | 0              | -2.872246               | 1.125485  | -0.469816 |
| 8                | 6                | 0              | -1.490243               | 1.149732  | -0.458205 |
| 9                | 6                | 0              | -0.698328               | -0.000013 | 0.000008  |
| 10               | 6                | 0              | -2.872309               | -1.125481 | 0.469654  |
| 11               | 6                | 0              | -1.490306               | -1.149706 | 0.458244  |
| 12               | 6                | 0              | 1.490272                | -1.149763 | -0.458214 |
| 13               | 6                | 0              | 2.872275                | -1.125487 | -0.469797 |
| 14               | 6                | 0              | 0.698328                | -0.000041 | 0.000014  |
| 15               | 6                | 0              | 1.490277                | 1.149675  | 0.458235  |
| 16               | 6                | 0              | 2.872279                | 1.125480  | 0.469672  |
| 17               | 6                | 0              | 0.988279                | 2.310221  | 1.158430  |
| 18               | 6                | 0              | 1.962919                | 3.131370  | 1.621784  |
| 19               | 16               | 0              | 3.549704                | 2.514370  | 1.266163  |
| 20               | 16               | 0              | 3.549705                | -2.514432 | -1.266191 |
| 21               | 6                | 0              | 1.962924                | -3.131547 | -1.621615 |
| 22               | 6                | 0              | 0.988280                | -2.310407 | -1.158254 |
| 23               | 6                | 0              | -3.740297               | -0.000045 | -0.000246 |
| 24               | 6                | 0              | 3.740297                | 0.000064  | -0.000221 |
| 25               | 1                | 0              | 0.060733                | -2.507740 | 1.317698  |
| 26               | 1                | 0              | -1.855086               | -4.059096 | 2.162344  |
| 27               | 1                | 0              | -1.854830               | 4.059394  | -2.161881 |
| 28               | 1                | 0              | 0.060892                | 2.507955  | -1.317192 |
| 29               | 1                | 0              | -0.060813               | 2.507712  | 1.317588  |
| 30               | 1                | 0              | 1.854956                | 4.059123  | 2.162255  |
| 31               | 1                | 0              | 1.854960                | -4.059368 | -2.161970 |
| 32               | 1                | 0              | -0.060811               | -2.507984 | -1.317301 |
| 33               | 1                | 0              | -4.404401               | -0.328218 | -0.812306 |
| 34               | 1                | 0              | -4.404756               | 0.328059  | 0.811549  |
| 35               | 1                | 0              | 4.404386                | 0.328256  | -0.812287 |



36 1 0 4.404771 -0.328020 0.811569

**Table S11.** Coordinates for optimized structure of the folded conformer of **m2** in the ground state ( $S_0$ ).

Total Energy: -2334.65758091 Hartree

# opt b3lyp/6-311+g(d,p)

| Center Number | Atomic Number | Atomic Type | Coordinates (Angstroms) |           |           |
|---------------|---------------|-------------|-------------------------|-----------|-----------|
|               |               |             | X                       | Y         | Z         |
| 1             | 6             | 0           | -1.270857               | 0.723860  | 2.455512  |
| 2             | 6             | 0           | -1.591542               | 1.671769  | 3.390169  |
| 3             | 16            | 0           | -1.307963               | 3.272011  | 2.814022  |
| 4             | 16            | 0           | -1.307943               | 3.272004  | -2.814025 |
| 5             | 6             | 0           | -1.591508               | 1.671760  | -3.390173 |
| 6             | 6             | 0           | -1.270830               | 0.723854  | -2.455511 |
| 7             | 6             | 0           | -0.786473               | 2.684866  | -1.259409 |
| 8             | 6             | 0           | -0.786473               | 1.288746  | -1.239474 |
| 9             | 6             | 0           | -0.375861               | 0.576347  | 0.000005  |
| 10            | 6             | 0           | -0.786482               | 2.684869  | 1.259412  |
| 11            | 6             | 0           | -0.786482               | 1.288748  | 1.239480  |
| 12            | 6             | 0           | 0.786482                | -1.288748 | 1.239480  |
| 13            | 6             | 0           | 0.786482                | -2.684869 | 1.259412  |
| 14            | 6             | 0           | 0.375861                | -0.576347 | 0.000005  |
| 15            | 6             | 0           | 0.786473                | -1.288746 | -1.239474 |
| 16            | 6             | 0           | 0.786473                | -2.684866 | -1.259409 |
| 17            | 6             | 0           | 1.270830                | -0.723854 | -2.455511 |
| 18            | 6             | 0           | 1.591508                | -1.671760 | -3.390173 |
| 19            | 16            | 0           | 1.307943                | -3.272004 | -2.814025 |
| 20            | 16            | 0           | 1.307963                | -3.272011 | 2.814022  |
| 21            | 6             | 0           | 1.591542                | -1.671769 | 3.390169  |
| 22            | 6             | 0           | 1.270857                | -0.723860 | 2.455512  |
| 23            | 1             | 0           | -1.403713               | -0.334047 | 2.626069  |
| 24            | 1             | 0           | -1.995618               | 1.509522  | 4.378308  |
| 25            | 1             | 0           | -1.995572               | 1.509510  | -4.378317 |
| 26            | 1             | 0           | -1.403677               | -0.334054 | -2.626068 |
| 27            | 1             | 0           | 1.403677                | 0.334054  | -2.626068 |
| 28            | 1             | 0           | 1.995572                | -1.509510 | -4.378317 |
| 29            | 1             | 0           | 1.995618                | -1.509522 | 4.378308  |
| 30            | 1             | 0           | 1.403713                | 0.334047  | 2.626069  |
| 31            | 5             | 0           | 0.671015                | -3.542290 | 0.000001  |
| 32            | 1             | 0           | 0.651530                | -4.731325 | -0.000000 |
| 33            | 5             | 0           | -0.671015               | 3.542290  | 0.000001  |
| 34            | 1             | 0           | -0.651530               | 4.731325  | -0.000000 |

**Table S12.** Coordinates for optimized structure of the twisted conformer of **m2** in the ground state ( $S_0$ ).

Total Energy: -2334.66912825 Hartree

# opt b3lyp/6-311+g(d,p)

| Center Number | Atomic Number | Atomic Type | Coordinates (Angstroms) |           |           |
|---------------|---------------|-------------|-------------------------|-----------|-----------|
|               |               |             | X                       | Y         | Z         |
| 1             | 6             | 0           | 0.922156                | 2.249738  | 1.248676  |
| 2             | 6             | 0           | 1.879318                | 3.090063  | 1.734044  |
| 3             | 16            | 0           | 3.475693                | 2.543289  | 1.354435  |
| 4             | 16            | 0           | 3.475717                | -2.543272 | -1.354536 |

|    |    |   |           |           |           |
|----|----|---|-----------|-----------|-----------|
| 5  | 6  | 0 | 1.879348  | -3.090052 | -1.734158 |
| 6  | 6  | 0 | 0.922178  | -2.249752 | -1.248764 |
| 7  | 6  | 0 | 2.867820  | -1.147981 | -0.515169 |
| 8  | 6  | 0 | 1.464055  | -1.140055 | -0.514870 |
| 9  | 6  | 0 | 0.707958  | -0.000028 | -0.000003 |
| 10 | 6  | 0 | 2.867810  | 1.147964  | 0.515116  |
| 11 | 6  | 0 | 1.464046  | 1.140019  | 0.514825  |
| 12 | 6  | 0 | -1.464043 | 1.140024  | -0.514823 |
| 13 | 6  | 0 | -2.867807 | 1.147974  | -0.515111 |
| 14 | 6  | 0 | -0.707958 | -0.000026 | 0.000006  |
| 15 | 6  | 0 | -1.464059 | -1.140051 | 0.514872  |
| 16 | 6  | 0 | -2.867823 | -1.147971 | 0.515174  |
| 17 | 6  | 0 | -0.922185 | -2.249749 | 1.248767  |
| 18 | 6  | 0 | -1.879358 | -3.090045 | 1.734164  |
| 19 | 16 | 0 | -3.475725 | -2.543268 | 1.354526  |
| 20 | 16 | 0 | -3.475685 | 2.543293  | -1.354444 |
| 21 | 6  | 0 | -1.879307 | 3.090071  | -1.734038 |
| 22 | 6  | 0 | -0.922149 | 2.249741  | -1.248673 |
| 23 | 1  | 0 | -0.132132 | 2.409990  | 1.419289  |
| 24 | 1  | 0 | 1.732017  | 3.992769  | 2.307951  |
| 25 | 1  | 0 | 1.732056  | -3.992740 | -2.308096 |
| 26 | 1  | 0 | -0.132108 | -2.410009 | -1.419386 |
| 27 | 1  | 0 | 0.132100  | -2.410008 | 1.419391  |
| 28 | 1  | 0 | -1.732069 | -3.992731 | 2.308105  |
| 29 | 1  | 0 | -1.732003 | 3.992779  | -2.307942 |
| 30 | 1  | 0 | 0.132140  | 2.409991  | -1.419283 |
| 31 | 5  | 0 | -3.722133 | 0.000005  | 0.000025  |
| 32 | 1  | 0 | -4.911623 | 0.000016  | 0.000029  |
| 33 | 5  | 0 | 3.722133  | -0.000011 | -0.000013 |
| 34 | 1  | 0 | 4.911622  | 0.000000  | -0.000026 |

**Table S13.** Coordinates for optimized structure of the folded conformer of **m3** in the ground state ( $S_0$ ).

Total Energy: -1079.29893998 Hartree

# opt b3lyp/6-311+g(d,p)

| Center<br>Number | Atomic<br>Number | Atomic<br>Type | Coordinates (Angstroms) |           |           |
|------------------|------------------|----------------|-------------------------|-----------|-----------|
|                  |                  |                | X                       | Y         | Z         |
| 1                | 6                | 0              | -2.036756               | 3.412317  | -1.143015 |
| 2                | 6                | 0              | -3.230278               | 3.435386  | -0.422251 |
| 3                | 6                | 0              | -3.578648               | 2.344731  | 0.371787  |
| 4                | 6                | 0              | -2.736225               | 1.237057  | 0.464381  |
| 5                | 6                | 0              | -1.509801               | 1.230350  | -0.225280 |
| 6                | 6                | 0              | -1.184542               | 2.316666  | -1.046341 |
| 7                | 6                | 0              | -2.736233               | -1.237046 | 0.464379  |
| 8                | 6                | 0              | -1.509810               | -1.230350 | -0.225284 |
| 9                | 6                | 0              | -0.671207               | -0.000003 | -0.108406 |
| 10               | 6                | 0              | -3.578668               | -2.344712 | 0.371778  |
| 11               | 6                | 0              | -3.230312               | -3.435365 | -0.422267 |
| 12               | 6                | 0              | -2.036790               | -3.412303 | -1.143035 |
| 13               | 6                | 0              | -1.184565               | -2.316663 | -1.046354 |
| 14               | 6                | 0              | 0.671187                | -0.000004 | 0.108405  |
| 15               | 6                | 0              | 1.509794                | 1.230342  | 0.225274  |
| 16               | 6                | 0              | 2.736207                | 1.237039  | -0.464411 |
| 17               | 6                | 0              | 2.736204                | -1.237055 | -0.464407 |
| 18               | 6                | 0              | 1.509792                | -1.230352 | 0.225280  |
| 19               | 6                | 0              | 1.184570                | 2.316647  | 1.046361  |
| 20               | 6                | 0              | 2.036814                | 3.412275  | 1.143049  |

|    |   |   |           |           |           |
|----|---|---|-----------|-----------|-----------|
| 21 | 6 | 0 | 3.230327  | 3.435331  | 0.422271  |
| 22 | 6 | 0 | 3.578659  | 2.344687  | -0.371800 |
| 23 | 6 | 0 | 3.578654  | -2.344704 | -0.371791 |
| 24 | 6 | 0 | 3.230322  | -3.435343 | 0.422288  |
| 25 | 6 | 0 | 2.036812  | -3.412279 | 1.143070  |
| 26 | 6 | 0 | 1.184570  | -2.316650 | 1.046377  |
| 27 | 1 | 0 | -1.772040 | 4.244573  | -1.785467 |
| 28 | 1 | 0 | -3.896058 | 4.288057  | -0.495118 |
| 29 | 1 | 0 | -4.520595 | 2.345975  | 0.911158  |
| 30 | 1 | 0 | -0.262131 | 2.301862  | -1.613166 |
| 31 | 1 | 0 | -4.520613 | -2.345949 | 0.911152  |
| 32 | 1 | 0 | -3.896102 | -4.288027 | -0.495140 |
| 33 | 1 | 0 | -1.772085 | -4.244558 | -1.785493 |
| 34 | 1 | 0 | -0.262155 | -2.301865 | -1.613180 |
| 35 | 1 | 0 | 0.262167  | 2.301855  | 1.613198  |
| 36 | 1 | 0 | 1.772127  | 4.244524  | 1.785523  |
| 37 | 1 | 0 | 3.896132  | 4.287981  | 0.495153  |
| 38 | 1 | 0 | 4.520597  | 2.345923  | -0.911187 |
| 39 | 1 | 0 | 4.520591  | -2.345945 | -0.911181 |
| 40 | 1 | 0 | 3.896125  | -4.287994 | 0.495173  |
| 41 | 1 | 0 | 1.772125  | -4.244522 | 1.785551  |
| 42 | 1 | 0 | 0.262169  | -2.301851 | 1.613218  |
| 43 | 6 | 0 | 3.104625  | -0.000010 | -1.254494 |
| 44 | 1 | 0 | 4.168101  | -0.000011 | -1.502494 |
| 45 | 1 | 0 | 2.557247  | -0.000010 | -2.208459 |
| 46 | 6 | 0 | -3.104701 | 0.000003  | 1.254432  |
| 47 | 1 | 0 | -2.557410 | 0.000006  | 2.208448  |
| 48 | 1 | 0 | -4.168199 | 0.000007  | 1.502340  |

**Table S14.** Coordinates for optimized structure of the twisted conformer of **m3** in the ground state ( $S_0$ ).

Total Energy: -1079.26857756 Hartree

# opt b3lyp/6-311+g(d,p)

| Center<br>Number | Atomic<br>Number | Atomic<br>Type | Coordinates (Angstroms) |           |           |
|------------------|------------------|----------------|-------------------------|-----------|-----------|
|                  |                  |                | X                       | Y         | Z         |
| 1                | 6                | 0              | -1.522318               | -3.180282 | 1.907769  |
| 2                | 6                | 0              | -2.918786               | -3.217937 | 1.828915  |
| 3                | 6                | 0              | -3.578726               | -2.184637 | 1.183279  |
| 4                | 6                | 0              | -2.881203               | -1.136055 | 0.569855  |
| 5                | 6                | 0              | -1.469544               | -1.127394 | 0.569902  |
| 6                | 6                | 0              | -0.823178               | -2.148882 | 1.310869  |
| 7                | 6                | 0              | -2.880218               | 1.137700  | -0.571745 |
| 8                | 6                | 0              | -1.468531               | 1.129372  | -0.569279 |
| 9                | 6                | 0              | -0.707544               | 0.000594  | 0.000244  |
| 10               | 6                | 0              | -3.576906               | 2.187238  | -1.184508 |
| 11               | 6                | 0              | -2.916117               | 3.221741  | -1.827315 |
| 12               | 6                | 0              | -1.519518               | 3.184391  | -1.903976 |
| 13               | 6                | 0              | -0.821175               | 2.152175  | -1.307562 |
| 14               | 6                | 0              | 0.707544                | -0.000325 | 0.000137  |
| 15               | 6                | 0              | 1.468219                | -1.129238 | -0.569535 |
| 16               | 6                | 0              | 2.879895                | -1.138075 | -0.571910 |
| 17               | 6                | 0              | 2.881527                | 1.135680  | 0.569690  |
| 18               | 6                | 0              | 1.469856                | 1.127531  | 0.569642  |
| 19               | 6                | 0              | 0.820513                | -2.151634 | -1.308071 |
| 20               | 6                | 0              | 1.518520                | -3.183896 | -1.904801 |
| 21               | 6                | 0              | 2.915112                | -3.221667 | -1.828237 |
| 22               | 6                | 0              | 3.576244                | -2.187595 | -1.185085 |

|    |   |   |           |           |           |
|----|---|---|-----------|-----------|-----------|
| 23 | 6 | 0 | 3.579388  | 2.184278  | 1.182709  |
| 24 | 6 | 0 | 2.919790  | 3.218011  | 1.827994  |
| 25 | 6 | 0 | 1.523314  | 3.180783  | 1.906935  |
| 26 | 6 | 0 | 0.823839  | 2.149431  | 1.310349  |
| 27 | 1 | 0 | -0.984680 | -3.945952 | 2.455752  |
| 28 | 1 | 0 | -3.477807 | -4.021050 | 2.295354  |
| 29 | 1 | 0 | -4.664478 | -2.170643 | 1.159982  |
| 30 | 1 | 0 | 0.251409  | -2.119852 | 1.421294  |
| 31 | 1 | 0 | -4.662693 | 2.172966  | -1.163071 |
| 32 | 1 | 0 | -3.474506 | 4.025579  | -2.293261 |
| 33 | 1 | 0 | -0.981086 | 3.951050  | -2.449795 |
| 34 | 1 | 0 | 0.253592  | 2.123669  | -1.416225 |
| 35 | 1 | 0 | -0.254249 | -2.122734 | -1.416703 |
| 36 | 1 | 0 | 0.979839  | -3.950232 | -2.450828 |
| 37 | 1 | 0 | 3.473241  | -4.025503 | -2.294498 |
| 38 | 1 | 0 | 4.662035  | -2.173692 | -1.163633 |
| 39 | 1 | 0 | 4.665136  | 2.169910  | 1.159430  |
| 40 | 1 | 0 | 3.479070  | 4.021124  | 2.294123  |
| 41 | 1 | 0 | 0.985924  | 3.946780  | 2.454704  |
| 42 | 1 | 0 | -0.250753 | 2.120800  | 1.420799  |
| 43 | 6 | 0 | -3.682436 | 0.000006  | -0.003197 |
| 44 | 1 | 0 | -4.349127 | -0.380382 | -0.789204 |
| 45 | 1 | 0 | -4.354541 | 0.379034  | 0.778780  |
| 46 | 6 | 0 | 3.682439  | -0.001106 | -0.002407 |
| 47 | 1 | 0 | 4.353103  | -0.380772 | 0.780520  |
| 48 | 1 | 0 | 4.350575  | 0.378647  | -0.787469 |

**Table S15.** Coordinates for optimized structure of the folded conformer of **m4** in the ground state ( $S_0$ ).

Total Energy: -1051.56368575 Hartree

# opt b3lyp/6-311+g(d,p)

| Center<br>Number | Atomic<br>Number | Atomic<br>Type | Coordinates (Angstroms) |           |           |
|------------------|------------------|----------------|-------------------------|-----------|-----------|
|                  |                  |                | X                       | Y         | Z         |
| 1                | 6                | 0              | -3.474728               | 1.893604  | 1.107823  |
| 2                | 6                | 0              | -3.575138               | 3.063987  | 0.355084  |
| 3                | 6                | 0              | -2.492571               | 3.468373  | -0.420001 |
| 4                | 6                | 0              | -1.303608               | 2.719281  | -0.462737 |
| 5                | 6                | 0              | -1.248338               | 1.487318  | 0.241764  |
| 6                | 6                | 0              | -2.327173               | 1.105202  | 1.043892  |
| 7                | 6                | 0              | 1.303562                | 2.719210  | -0.462864 |
| 8                | 6                | 0              | 1.248294                | 1.487250  | 0.241642  |
| 9                | 6                | 0              | -0.000047               | 0.671366  | 0.127350  |
| 10               | 6                | 0              | 2.492579                | 3.468223  | -0.420262 |
| 11               | 6                | 0              | 3.575220                | 3.063746  | 0.354674  |
| 12               | 6                | 0              | 3.474840                | 1.893342  | 1.107383  |
| 13               | 6                | 0              | 2.327222                | 1.105020  | 1.043588  |
| 14               | 6                | 0              | -0.000053               | -0.671366 | -0.127350 |
| 15               | 6                | 0              | -1.248350               | -1.487308 | -0.241765 |
| 16               | 6                | 0              | -1.303630               | -2.719270 | 0.462737  |
| 17               | 6                | 0              | 1.303540                | -2.719220 | 0.462864  |
| 18               | 6                | 0              | 1.248281                | -1.487260 | -0.241642 |
| 19               | 6                | 0              | -2.327182               | -1.105183 | -1.043893 |
| 20               | 6                | 0              | -3.474744               | -1.893576 | -1.107823 |
| 21               | 6                | 0              | -3.575163               | -3.063957 | -0.355084 |
| 22               | 6                | 0              | -2.492599               | -3.468353 | 0.420001  |
| 23               | 6                | 0              | 2.492551                | -3.468243 | 0.420262  |
| 24               | 6                | 0              | 3.575195                | -3.063776 | -0.354673 |

|    |   |   |           |           |           |
|----|---|---|-----------|-----------|-----------|
| 25 | 6 | 0 | 3.474825  | -1.893371 | -1.107383 |
| 26 | 6 | 0 | 2.327213  | -1.105039 | -1.043588 |
| 27 | 1 | 0 | -4.295079 | 1.588956  | 1.748672  |
| 28 | 1 | 0 | -4.478104 | 3.662914  | 0.394695  |
| 29 | 1 | 0 | -2.545842 | 4.397029  | -0.979186 |
| 30 | 1 | 0 | -2.273305 | 0.195257  | 1.628110  |
| 31 | 1 | 0 | 2.545844  | 4.396881  | -0.979444 |
| 32 | 1 | 0 | 4.478234  | 3.662610  | 0.394175  |
| 33 | 1 | 0 | 4.295263  | 1.588613  | 1.748101  |
| 34 | 1 | 0 | 2.273379  | 0.195048  | 1.627768  |
| 35 | 1 | 0 | -2.273307 | -0.195238 | -1.628110 |
| 36 | 1 | 0 | -4.295092 | -1.588920 | -1.748672 |
| 37 | 1 | 0 | -4.478134 | -3.662877 | -0.394695 |
| 38 | 1 | 0 | -2.545878 | -4.397008 | 0.979187  |
| 39 | 1 | 0 | 2.545808  | -4.396902 | 0.979444  |
| 40 | 1 | 0 | 4.478204  | -3.662646 | -0.394175 |
| 41 | 1 | 0 | 4.295250  | -1.588648 | -1.748101 |
| 42 | 1 | 0 | 2.273377  | -0.195066 | -1.627768 |
| 43 | 5 | 0 | -0.000062 | -3.305114 | 1.044689  |
| 44 | 1 | 0 | -0.000079 | -4.261344 | 1.759868  |
| 45 | 5 | 0 | -0.000035 | 3.305114  | -1.044690 |
| 46 | 1 | 0 | -0.000044 | 4.261344  | -1.759868 |

**Table S16.** Coordinates for optimized structure of the twisted conformer of **m4** in the ground state ( $S_0$ ).

Total Energy: -1051.56368575 Hartree

# opt b3lyp/6-311+g(d,p)

| Center<br>Number | Atomic<br>Number | Atomic<br>Type | Coordinates (Angstroms) |           |           |
|------------------|------------------|----------------|-------------------------|-----------|-----------|
|                  |                  |                | X                       | Y         | Z         |
| 1                | 6                | 0              | -1.443593               | -3.122036 | 2.007493  |
| 2                | 6                | 0              | -2.837277               | -3.218714 | 1.916458  |
| 3                | 6                | 0              | -3.532500               | -2.234738 | 1.229521  |
| 4                | 6                | 0              | -2.873817               | -1.172517 | 0.580366  |
| 5                | 6                | 0              | -1.447703               | -1.120221 | 0.607294  |
| 6                | 6                | 0              | -0.766921               | -2.083849 | 1.389751  |
| 7                | 6                | 0              | -2.873786               | 1.172499  | -0.580451 |
| 8                | 6                | 0              | -1.447671               | 1.120192  | -0.607322 |
| 9                | 6                | 0              | -0.714386               | -0.000023 | -0.000013 |
| 10               | 6                | 0              | -3.532433               | 2.234738  | -1.229613 |
| 11               | 6                | 0              | -2.837172               | 3.218725  | -1.916497 |
| 12               | 6                | 0              | -1.443484               | 3.122043  | -2.007469 |
| 13               | 6                | 0              | -0.766846               | 2.083837  | -1.389720 |
| 14               | 6                | 0              | 0.714386                | -0.000020 | 0.000011  |
| 15               | 6                | 0              | 1.447708                | -1.120215 | -0.607295 |
| 16               | 6                | 0              | 2.873823                | -1.172505 | -0.580365 |
| 17               | 6                | 0              | 2.873780                | 1.172512  | 0.580451  |
| 18               | 6                | 0              | 1.447666                | 1.120198  | 0.607321  |
| 19               | 6                | 0              | 0.766931                | -2.083847 | -1.389752 |
| 20               | 6                | 0              | 1.443609                | -3.122031 | -2.007493 |
| 21               | 6                | 0              | 2.837293                | -3.218702 | -1.916456 |
| 22               | 6                | 0              | 3.532511                | -2.234724 | -1.229519 |
| 23               | 6                | 0              | 3.532422                | 2.234753  | 1.229615  |
| 24               | 6                | 0              | 2.837156                | 3.218736  | 1.916499  |
| 25               | 6                | 0              | 1.443469                | 3.122048  | 2.007468  |
| 26               | 6                | 0              | 0.766836                | 2.083840  | 1.389718  |
| 27               | 1                | 0              | -0.885380               | -3.852223 | 2.583321  |
| 28               | 1                | 0              | -3.363704               | -4.029273 | 2.407745  |

|    |   |   |           |           |           |
|----|---|---|-----------|-----------|-----------|
| 29 | 1 | 0 | -4.616902 | -2.260627 | 1.200804  |
| 30 | 1 | 0 | 0.304076  | -2.012727 | 1.521581  |
| 31 | 1 | 0 | -4.616836 | 2.260634  | -1.200942 |
| 32 | 1 | 0 | -3.363572 | 4.029299  | -2.407789 |
| 33 | 1 | 0 | -0.885241 | 3.852242  | -2.583252 |
| 34 | 1 | 0 | 0.304157  | 2.012712  | -1.521499 |
| 35 | 1 | 0 | -0.304065 | -2.012729 | -1.521584 |
| 36 | 1 | 0 | 0.885400  | -3.852221 | -2.583322 |
| 37 | 1 | 0 | 3.363724  | -4.029259 | -2.407743 |
| 38 | 1 | 0 | 4.616914  | -2.260607 | -1.200801 |
| 39 | 1 | 0 | 4.616825  | 2.260654  | 1.200945  |
| 40 | 1 | 0 | 3.363551  | 4.029312  | 2.407791  |
| 41 | 1 | 0 | 0.885221  | 3.852244  | 2.583252  |
| 42 | 1 | 0 | -0.304167 | 2.012710  | 1.521496  |
| 43 | 5 | 0 | -3.667524 | -0.000011 | -0.000069 |
| 44 | 1 | 0 | -4.862541 | -0.000005 | -0.000089 |
| 45 | 5 | 0 | 3.667524  | 0.000005  | 0.000070  |
| 46 | 1 | 0 | 4.862541  | 0.000016  | 0.000092  |

---
